1

2

## **A new technology for isolating organellar membranes provides**

3

## **fingerprints of lipid bilayer stress**

4

5 John Reinhard<sup>1,2</sup>, Leonhard Starke<sup>3</sup>, Christian Klose<sup>4</sup>, Per Haberkant<sup>5</sup>, Henrik Hammarén<sup>6</sup>,

6 Frank Stein<sup>5</sup>, Ofir Klein<sup>7</sup>, Charlotte Berhorst<sup>1,2</sup>, Heike Stumpf<sup>1,2</sup>,

7 James P. Sáenz<sup>8</sup>, Jochen Hub<sup>3</sup>, Maya Schuldiner<sup>7</sup>, Robert Ernst<sup>1,2</sup>

8

9 <sup>1</sup>Saarland University, Medical Biochemistry and Molecular Biology, Homburg, Germany

10 <sup>2</sup>Saarland University, Preclinical Center for Molecular Signaling (PZMS), Homburg, Germany

11 <sup>3</sup>Saarland University, Theoretical Physics and Center for Biophysics, Saarbrücken, Germany

12 <sup>4</sup>Lipotype GmbH, Dresden, Germany

13 <sup>5</sup>EMBL Heidelberg, Proteomics Core Facility, Heidelberg, Germany

14 <sup>6</sup>EMBL Heidelberg, Genome Biology, Heidelberg, Germany

15 <sup>7</sup>Weizmann Institute of Science, Department of Molecular Genetics, Rehovot, Israel

16 <sup>8</sup>Technische Universität Dresden, B CUBE, Dresden, Germany

17

## 18 **Abstract**

19 Biological membranes have a stunning ability to adapt their composition in response to physiological  
20 stress and metabolic challenges. Little is known how such perturbations affect individual organelles in  
21 eukaryotic cells. Pioneering work provided insights into the subcellular distribution of lipids, but the  
22 composition of the endoplasmic reticulum (ER) membrane, which also crucially regulates lipid  
23 metabolism and the unfolded protein response, remained insufficiently characterized. Here we describe  
24 a method for purifying organellar membranes from yeast, MemPrep. We demonstrate the purity of our  
25 ER preparations by quantitative proteomics and document the general utility of MemPrep by isolating  
26 vacuolar membranes. Quantitative lipidomics establishes the lipid composition of the ER and the  
27 vacuolar membrane. Our findings have important implications for understanding the role of lipids in  
28 membrane protein insertion, folding, and their sorting along the secretory pathway. Application of the  
29 combined preparative and analytical platform to acutely stressed cells reveals dynamic ER membrane  
30 remodeling and establishes molecular fingerprints of lipid bilayer stress.

31

## 32 Introduction

33 Biological membranes are complex assemblies of lipids and proteins. Their compositions and  
34 properties are dynamically regulated in response to stress and various physical and metabolic cues  
35 (Harayama & Riezman, 2018; Ernst *et al*, 2018). A prominent example is the homeoviscous adaptation,  
36 where the lipid composition is adapted to temperature to maintain membrane fluidity and membrane  
37 phase behavior (Sinensky, 1974; Ernst *et al*, 2016; Harayama & Riezman, 2018). Even mammals, which  
38 maintain a constant body temperature, can readily adjust their membrane composition in response to  
39 dietary perturbation with major impact on collective bilayer properties such as fluidity, thickness, surface  
40 charge or stiffness (Bigay & Antonny, 2012; Levental *et al*, 2020). Eukaryotic cells face the challenge of  
41 maintaining the properties of not just a single plasma membrane but that of several coexisting organellar  
42 membranes each with unique lipid compositions and each exchanging membrane material with other  
43 organelles via vesicular carriers and/or lipid transfer proteins. Despite recent advances to manipulate  
44 and follow membrane properties (John Peter *et al*, 2022; Renne *et al*, 2022; preprint: Jiménez-Rojo *et al*,  
45 2022; preprint: Tsuchiya *et al*, 2022), we know little about how stressed cells coordinate membrane  
46 adaptation between organelles whilst maintaining organelle identity and functions.

47 The endoplasmic reticulum (ER) is a hotspot for lipid biosynthesis (Zinser *et al*, 1991; Henry *et al*,  
48 2012) and provides an entry to the secretory pathway for soluble and transmembrane proteins. The  
49 flux of proteins and lipids through the secretory pathway is controlled by the unfolded protein response  
50 (UPR) (Travers *et al*, 2000; Walter & Ron, 2011). When the protein folding capacity of the ER is  
51 overwhelmed, unfolded proteins are sensed by the type I membrane protein Ire1 thereby triggering the  
52 UPR. The UPR lowers the rate of global protein synthesis, whilst upregulating the ER luminal folding  
53 machinery, ER-associated protein degradation, and lipid biosynthesis enzymes (Travers *et al*, 2000;  
54 Walter & Ron, 2011). We have recently shown that Ire1 in *Saccharomyces cerevisiae* (from here on  
55 'yeast') uses a hydrophobic mismatch-based mechanism to sense aberrant stiffening of the  
56 ER membrane thereby rendering it responsive to various lipid metabolic perturbations (Halbleib *et al*,  
57 2017). Known conditions of this membrane-based UPR, termed lipid bilayer stress, include inositol-  
58 depletion (Cox *et al*, 1997; Promlek *et al*, 2011), increased lipid saturation (Pineau *et al*, 2009; Surma  
59 *et al*, 2013), increased sterol levels (Feng *et al*, 2003; Pineau *et al*, 2009), misregulated sphingolipid  
60 metabolism (Han *et al*, 2010), and a disrupted conversion of phosphatidylethanolamine (PE) to  
61 phosphatidylcholine (PC) (Ho *et al*, 2020; Ishiwata-Kimata *et al*, 2022). Even prolonged proteotoxic  
62 stresses can activate the UPR via a yet poorly defined, membrane-based mechanism (Promlek *et al*,  
63 2011; Văth *et al*, 2021). While lipid bilayer stress is evolutionary conserved among eukaryotes (Volmer  
64 *et al*, 2013; Hou *et al*, 2014; Ho *et al*, 2018; Pérez-Martí *et al*, 2022), its molecular manifestations in the  
65 ER membrane with respect to the lipid and protein composition remains unexplored.

66 Regardless of Ire1's dual sensitivity for proteotoxic and lipid bilayer stress the mechanism of  
67 signal transduction is similar for both conditions: Dimerization/Oligomerization of Ire1 juxtaposes its  
68 cytosolic kinase/RNase domains thereby triggering the *trans*-autophosphorylation and the activation of  
69 the RNase domain (Walter & Ron, 2011; Văth *et al*, 2021). The subsequent cleavage of the *HAC1*  
70 mRNA serves as the committed step for generating the Hac1 transcription factor, which translocates to  
71 the nucleus and upregulates hundreds of UPR-target genes (Travers *et al*, 2000; Ho *et al*, 2020).

72           The UPR is a key target of lipotoxicity, and pathological manifestations of chronic ER stress in  
73 complex, metabolic diseases such as diabetes, atherosclerosis, and non-alcoholic fatty liver disease  
74 feature characteristic lipid fingerprints (Puri *et al*, 2007; Tabassum *et al*, 2019; Lauber *et al*, 2022). Yet,  
75 the contribution of lipid bilayer stress to health and disease remains understudied (Hotamisligil, 2010).  
76 Yeast is an ideal model organism to decipher fundamental (patho)mechanisms of the lipid metabolic  
77 network, the secretory pathway, membrane traffic, and membrane homeostasis (Kurat *et al*, 2006;  
78 Henry *et al*, 2012; Ralph-Epps *et al*, 2021). Recent advances in quantitative lipidomics (Ejsing *et al*,  
79 2009) have provided deep insight into the flexibility and adaptation of the cellular lipidome to various  
80 metabolic and physical stimuli in both yeast and mammals (Klose *et al*, 2012; Casanovas *et al*, 2015;  
81 Levental *et al*, 2020; Surma *et al*, 2021). However, unless these analytical platforms are paired with  
82 powerful techniques for isolating organellar membranes from stressed and unstressed cells, they lack  
83 the subcellular resolution, which is essential to understand how lipid metabolism is organized between  
84 organelles.

85           Tremendous efforts have been invested in the characterization of organellar membranes (Zinser  
86 & Daum, 1995; Schneider *et al*, 1999; Klemm *et al*, 2009; Surma *et al*, 2011; Reglinski *et al*, 2020), but  
87 we still lack comprehensive and quantitative information on the yeast ER. This is probably because the  
88 ER forms extensive membrane contact sites (MCSs) with other organelles, which makes its isolation  
89 technically challenging (English & Voeltz, 2013; Scorrano *et al*, 2019). Here, we describe a protocol for  
90 the isolation of highly enriched organellar membranes, MemPrep. We demonstrate the utility of  
91 MemPrep by the successful isolation of both ER and vacuolar membranes from yeast. An in-depth  
92 analysis by quantitative lipidomics reveals that the ER membrane is characterized by a particularly high  
93 fraction of unsaturated fatty acyl chains in glycerophospholipids (74.1 mol%). Furthermore, our  
94 observations suggest the absence of a sterol gradient in the early secretory pathway and a substantial  
95 retrograde flux of complex sphingolipids from the Golgi complex to the ER. By analyzing the lipid  
96 composition of the stressed ER, we establish molecular fingerprints of lipid bilayer stress and identify a  
97 potential role of anionic lipids as negative regulators of the UPR. Our work provides further evidence for  
98 an important role of saturated lipids in UPR activation by affecting membrane thickness and stiffness.  
99 The MemPrep approach will be crucial to dissect membrane adaptation to metabolic, proteotoxic, and  
100 physical stresses on the organelle level in the future.

101

## 102 **Material and Methods**

### 103 **Generation of MemPrep library**

104 The C-terminus SWAp Tag (SWAT) library from yeast was used to generate a library with a C-  
105 terminal tag as previously published (Meurer *et al*, 2018). In short, a SWAT donor strain (yMS2085) was  
106 transformed with a donor plasmid (pMS1134) containing the myc-HRV-FLAG cassette and then  
107 SWATted as described. The final library genotype is his3 $\Delta$ 1 leu2 $\Delta$ 0 met15 $\Delta$ 0 ura3 $\Delta$ 0, can1 $\Delta$ ::GAL1pr-  
108 Scel-NLS::STE2pr-SpHIS5, lyp1 $\Delta$ ::STE3pr-LEU2, XXX::L3-myc-HRV-3xFLAG-ADH1ter-TEFpr-  
109 KanMX-TEFter-L4]. Once generated, to check that proper integration of the cassette into the genome,  
110 random proteins were tested by PCR and SDS-PAGE, confirming their in-frame tagging.

### 111 **Fluorescence microscopy**

112 3  $\mu$ l of a yeast cell suspension (OD<sub>600</sub> = 50), crude cell lysates or a fraction from the isolation  
113 procedure were placed on a thin SCD-(1%)-agarose pad and then covered with a coverslip. Images  
114 were acquired on an Axio Observer Z1 equipped with a Rolera em-c2 camera (QImaging) and a Colibri  
115 7 (Zeiss) light source for fluorescence excitation. Using either an EC Plan-Neofluar 100x/1.3 or an EC  
116 Plan-Apochromat 63x/1.4 objective in combination with a 1.6x tube lens (Zeiss), GFP fluorescence was  
117 excited using a 475 nm LED module and a 38 HE filter (Zeiss). Differential interference contrast (DIC)  
118 images were acquired using a translight LED light source. Image contrasts were adjusted using Fiji  
119 (Schindelin *et al*, 2012).

### 120 **Cell cultivation**

121 Cells were cultivated at 30 °C in SCD<sub>complete</sub> medium (0.79 g/l complete supplement mixture  
122 [Formedium, batch no: FM0418/8363, FM0920/10437], 1.9 g/l yeast nitrogen base without amino acids  
123 and without ammonium sulfate (YNB) [Formedium, batch no: FM0A616/006763, FM0718/8627], 5 g/l  
124 ammonium sulfate [Carl Roth] and 20 g/l glucose [ACS, anhydrous, Carl Roth]) and constantly agitated  
125 by shaking the cultures at 220 rpm. Unless stated otherwise, overnight cultures (21 h) were used to  
126 inoculate a main culture to an OD<sub>600</sub> of 0.1. Cells were harvested by centrifugation (3,000 x g, 5 min,  
127 RT) at an OD<sub>600</sub> of 1.0, washed with 25 ml ice-cold PBS, snap-frozen in liquid nitrogen, and stored at -  
128 80 °C until further use. In each case ER and vacuolar membranes were isolated from a total of 2,000  
129 and 4,000 OD<sub>600</sub> units, respectively. This general procedure for cell cultivation and harvesting was also  
130 employed for stressed cells, with minor adaptations. For isolating the ER from cells before and after the  
131 induction of prolonged proteotoxic stresses, the cells were cultivated in the absence of stress to an  
132 OD<sub>600</sub> of 0.8 and a 'pre-stress' sample was harvested. The residual culture was supplemented with  
133 either 2 mM dithiothreitol (DTT) or 1.5  $\mu$ g/ml Tunicamycin (TM) and cultivated for another 4 hours prior  
134 to harvesting the cells. For isolating the ER from inositol-depleted cells, a first culture was inoculated to  
135 an OD<sub>600</sub> of 0.003 and cultivated overnight to an OD<sub>600</sub> of 1.2. Cells from this culture were pelleted (3,000  
136 x g, 5 min, RT), washed twice with 100 ml pre-warmed inositol-free medium (SCD<sub>complete-ino</sub> prepared  
137 using yeast nitrogen base lacking inositol (YNB-ino) [Formedium batch no: FM0619/9431]). The washed  
138 cells were then resuspended in either inositol-containing SCD<sub>complete</sub> (control) or in SCD<sub>complete-ino</sub>

139 (inositol-depletion) medium to an OD<sub>600</sub> of 0.6 and cultivated for another two hours prior to harvesting  
140 the cells.

141

142

### 143 ***Cell lysis and differential centrifugation***

144 Frozen cell pellets of 1,000 OD<sub>600</sub> units were thawed on ice, resuspended in microsomes  
145 preparation (MP) buffer (25 mM HEPES pH 7.0, 600 mM mannitol, 1 mM EDTA, 0.03 mg/ml protease  
146 inhibitor cocktail [pepstatin, antipain, chymotrypsin] and 12.5 units/ml benzonase nuclease [Sigma  
147 Aldrich]) and mechanically disrupted in 15 ml reaction tubes previously loaded with 13 g zirconia/silica  
148 beads (0.5 mm diameter, Carl Roth) using a FastPrep-24 bead beater (5 m/s, 10 cycles of 15 s beating  
149 and 45 s of cooling in an ice bath). Cell lysates were centrifuged twice (3,234 x g, 5 min, 4 °C) in a  
150 swinging bucket rotor to remove unbroken cells, cell debris and nuclei. The resulting post nuclear  
151 supernatant (PNS) was centrifuged (12,000 x g, 20 min, 4 °C) in a Beckman type 70 Ti rotor to remove  
152 large organelle fragments. Using the same rotor, the resulting supernatant (S12) was centrifuged  
153 (100,000 x g, 1 h, 4 °C) to obtain microsomes in the pellet. Microsomes were resuspended in 1 ml MP  
154 buffer per 1,000 OD<sub>600</sub> units original cell mass, snap frozen in liquid nitrogen, and stored at -80 °C until  
155 further use. For subsequent proteomics analyses of (pre-)stressed cells (Figure 5), microsomes were  
156 additionally resuspended in MP buffer containing 200 mM sodium carbonate (pH 10.6) and incubated  
157 rotating overhead at 3 rpm and 4 °C for 1 h to remove soluble and membrane-associated proteins.  
158 Carbonate-washed microsomes were neutralized by addition of concentrated HCl, sedimented by  
159 ultracentrifugation (100,000 x g, 1 h, 4 °C), resuspended in 1 ml MP buffer per 1,000 OD<sub>600</sub> units original  
160 cell mass, snap frozen in liquid nitrogen, and stored at -80 °C until further use.

### 161 ***Immuno-isolation***

162 The entire isolation procedure was performed on ice or at 4 °C. Microsomes were thawed in  
163 1.5 ml reaction tubes and then dissociated using a sonotrode (MS72) on a Bandelin Sonopuls HD 2070  
164 with 50 % power and 10 pulses of each 0.7 s (duty cycle 0.7). After sonication, the microsomes were  
165 centrifuged (3,000 x g, 3 min, 4 °C). 700 µl of the resulting supernatant (corresponding to 700 OD<sub>600</sub>  
166 units) were mixed with 700 µl immunoprecipitation (IP) buffer (25 mM HEPES pH 7.0, 150 mM NaCl, 1  
167 mM EDTA) and loaded onto magnetic beads (dynabeads, protein G, 2.8 µm diameter, Invitrogen), which  
168 were previously decorated with sub-saturating quantities of a monoclonal anti-FLAG antibody (M2,  
169 F1804, Sigma Aldrich). Specifically, the affinity matrix was prepared by using 800 µl of magnetic bead  
170 slurry per 700 OD<sub>600</sub> units of cells, which were incubated overnight at 4 °C with 3.2 µg of the anti-FLAG  
171 antibody using an overhead rotor at 20 rpm. Subsequently, microsomes were loaded on the antibody-  
172 decorated magnetic beads and allowed to bind for two hours at 4 °C using an overhead rotor at 3 rpm.

173 The bound membrane vesicles were washed two times with 1.4 ml of wash buffer (25 mM  
174 HEPES pH 7.0, 75 mM NaCl, 600 mM urea, 1 mM EDTA) and twice with 1.4 ml of IP buffer. Specific  
175 elution was performed by resuspension of the affinity matrix in 700 µl elution buffer (PBS pH 7.4, 0.5  
176 mM EDTA, 1 mM DTT, and 0.04 mg/ml affinity purified GST-HRV3C protease) per 700 OD<sub>600</sub> units of  
177 original cell mass followed by an incubation for two hours at 4 °C on an overhead rotor at 3 rpm. The  
178 eluate was centrifuged (264,360 x g, 2 h, 4°C) in a Beckman TLA 100.3 rotor to harvest the ER- or

179 vacuole-derived vesicles. The membrane pellet was resuspended in 200  $\mu$ l PBS per 1,400 OD<sub>600</sub> units  
180 of original cell mass (isolate), snap frozen, and stored at -80 °C until lipid extraction and lipidomics  
181 analysis. For proteomics experiments the membrane pellet was resuspended in 40  $\mu$ l PBS-SDS (1 %  
182 per 1,400 OD<sub>600</sub> units.

### 183 **Liposome fusion assay**

184 POPC liposomes containing 2 mol% 1,2-dioleoyl-sn-glycero-3-phosphoethanolamineN-(7-nitro-  
185 2-1,3-benzoxadiazol-4-yl) (NBD-PE) and 2 mol% 1,2-dioleoyl-sn-glycero-3-phosphoethanolamine-N-  
186 (lissamine rhodamine B sulfonyl) (Rho-PE) were prepared by rehydrating dried lipids in MP buffer.  
187 Liposomes were made unilamellar by consecutive extrusion through 0.4  $\mu$ m and 0.2  $\mu$ m filters with 13  
188 strokes each. NBD-PE and Rho-PE at a concentration of 2 mol% each form an efficient FRET pair  
189 (Weber *et al*, 1998). Labeled liposomes were mixed with an 8.2-fold excess (microsome concentration  
190 determined by scattering as described here (Kaiser *et al*, 2011), of unlabelled P100 microsomes and  
191 sonicated as described for the immuno-isolation (sonotrode MS72 using a Bandelin Sonopuls HD 2070  
192 with 50 % volume for 10 s as 70 % pulse). Donor fluorescence intensity of the FRET pair in the  
193 microsomes-liposomes-mixture ( $I_{DA}$ ) was measured at 530 nm using an Infinite 200 Pro (Tecan) plate  
194 reader. Donor only fluorescence ( $I_D$ ) was measured at the same wavelength after addition of Triton X-  
195 100 to a final concentration of 1 %. Relative FRET efficiencies ( $E_{rel}$ ) were calculated as follows:  $E_{rel} = 1 -$   
196 ( $I_{DA}/I_D$ ).

### 197 **Lipid extraction for mass spectrometry lipidomics**

198 Mass spectrometry-based lipid analysis was performed by Lipotype GmbH (Dresden, Germany)  
199 as described (Ejsing *et al*, 2009; Klose *et al*, 2012). Lipids were extracted using a two-step  
200 chloroform/methanol procedure (Ejsing *et al*, 2009). Samples were spiked with internal lipid standard  
201 mixture containing: CDP-DAG 17:0/18:1, ceramide 18:1;2/17:0 (Cer), diacylglycerol 17:0/17:0 (DAG),  
202 lyso-phosphatidate 17:0 (LPA), lyso-phosphatidylcholine 12:0 (LPC), lyso-phosphatidylethanolamine  
203 17:1 (LPE), lyso-phosphatidylinositol 17:1 (LPI), lyso-phosphatidylserine 17:1 (LPS), phosphatidate  
204 17:0/14:1 (PA), phosphatidylcholine 17:0/14:1 (PC), phosphatidylethanolamine 17:0/14:1 (PE),  
205 phosphatidylglycerol 17:0/14:1 (PG), phosphatidylinositol 17:0/14:1 (PI), phosphatidylserine 17:0/14:1  
206 (PS), ergosterol ester 13:0 (EE), triacylglycerol 17:0/17:0/17:0 (TAG), stigmastatrienol,  
207 inositolphosphorylceramide 44:0;2 (IPC), mannosyl-inositolphosphorylceramide 44:0;2 (MIPC) and  
208 mannosyl-di-(inositolphosphoryl)ceramide 44:0;2 (M(IP)2C). After extraction, the organic phase was  
209 transferred to an infusion plate and dried in a speed vacuum concentrator. 1st step dry extract was re-  
210 suspended in 7.5 mM ammonium acetate in chloroform/methanol/propanol (1:2:4, V:V:V) and 2nd step  
211 dry extract in 33 % ethanol solution of methylamine in chloroform/methanol (0.003:5:1; V:V:V). All liquid  
212 handling steps were performed using Hamilton Robotics STARlet robotic platform with the Anti Droplet  
213 Control feature for organic solvents pipetting.

### 214 **MS data acquisition for lipidomics**

215 Samples were analyzed by direct infusion on a QExactive mass spectrometer (Thermo  
216 Scientific) equipped with a TriVersa NanoMate ion source (Advion Biosciences). Samples were



217 analyzed in both positive and negative ion modes with a resolution of  $R_{m/z=200}=280000$  for MS and  
218  $R_{m/z=200}=17500$  for MSMS experiments, in a single acquisition. MS/MS was triggered by an inclusion  
219 list encompassing corresponding MS mass ranges scanned in 1 Da increments (Surma *et al*, 2015).  
220 Both MS and MSMS data were combined to monitor EE, DAG and TAG ions as ammonium adducts;  
221 PC as an acetate adduct; and CL, PA, PE, PG, PI and PS as deprotonated anions. MS only was used  
222 to monitor LPA, LPE, LPI, LPS, IPC, MIPC, M(IP)2C as deprotonated anions; Cer and LPC as acetate  
223 adducts and ergosterol as protonated ion of an acetylated derivative (Liebisch *et al*, 2006).

#### 224 **Data analysis and post-processing for lipidomics**

225 Data were analyzed with in-house developed lipid identification software based on LipidXplorer  
226 (Herzog *et al*, 2011; Herzog *et al*, 2012). Data post-processing and normalization were performed using  
227 an in-house developed data management system. Only lipid identifications with a signal-to-noise ratio  
228  $>5$ , and a signal intensity 5-fold higher than in corresponding blank samples were considered for further  
229 data analysis.

#### 230 **Sample preparation for proteomics via LC-MS/MS**

231 Lysates were adjusted to 1 % SDS and a final concentration 1 mg/ml. 5  $\mu$ g of cell lysates and  
232 10  $\mu$ g of ER membrane were subjected to an in-solution tryptic digest using a modified version of the  
233 Single-Pot Solid-Phase-enhanced Sample Preparation (SP3) protocol (Hughes *et al*, 2014; Moggridge  
234 *et al*, 2018). In total three biological replicates were prepared including control, wild-type and mutant  
235 derived lysates (n=3). Lysates were added to Sera-Mag Beads (Thermo Scientific, #4515-2105-050250,  
236 6515-2105-050250) in 10  $\mu$ l 15 % formic acid and 30  $\mu$ l of ethanol. Binding of proteins was achieved by  
237 shaking for 15 min at room temperature. SDS was removed by 4 subsequent washes with 200  $\mu$ l of 70  
238 % ethanol. Proteins were digested overnight at room temperature with 0.4  $\mu$ g of sequencing grade  
239 modified trypsin (Promega, #V5111) in 40  $\mu$ l Hepes/NaOH, pH 8.4 in the presence of 1.25 mM TCEP  
240 and 5 mM chloroacetamide (Sigma-Aldrich, #C0267). Beads were separated, washed with 10  $\mu$ l of an  
241 aqueous solution of 2 % DMSO and the combined eluates were dried down. Peptides of ER membranes  
242 were reconstituted in 10  $\mu$ l of H<sub>2</sub>O and reacted for 1 h at room temperature with 80  $\mu$ g of TMT10plex  
243 (Thermo Scientific, #90111) (Werner *et al*, 2014) label reagent dissolved in 4  $\mu$ l of acetonitrile. Peptides  
244 of cell lysates were reconstituted in 10  $\mu$ l of H<sub>2</sub>O and reacted for 1 h at room temperature with 50  $\mu$ g of  
245 TMT16pro<sup>TM</sup> label reagent (Thermo Scientific, #A44521) dissolved in 4  $\mu$ l of acetonitrile. Excess TMT  
246 reagent was quenched by the addition of 4  $\mu$ l of an aqueous 5 % hydroxylamine solution (Sigma,  
247 438227). Peptides were reconstituted in 0.1 % formic acid, mixed to achieve a 1:1 ratio across all TMT-  
248 channels and purified by a reverse phase clean-up step (OASIS HLB 96-well  $\mu$ Elution Plate, Waters  
249 #186001828BA). Peptides were subjected to an off-line fractionation under high pH conditions (Hughes  
250 *et al*, 2014). The resulting 12 fractions were then analyzed by LC-MS/MS on an Orbitrap Fusion Lumos  
251 mass spectrometer.

#### 252 **LC-MS/MS analysis of ER membranes**

253 Peptides were separated using an Ultimate 3000 nano RSLC system (Dionex) equipped with a  
254 trapping cartridge (Precolumn C18 PepMap100, 5 mm, 300  $\mu$ m i.d., 5  $\mu$ m, 100 Å) and an analytical



255 column (Acclaim PepMap 100. 75 × 50 cm C18, 3 mm, 100 Å) connected to a nanospray-Flex ion  
256 source. The peptides were loaded onto the trap column at 30 µl per min using solvent A (0.1 % formic  
257 acid) and eluted using a gradient from 2 to 38 % Solvent B (0.1 % formic acid in acetonitrile) over 52  
258 min and then to 80 % at 0.3 µl per min (all solvents were of LC-MS grade). The Orbitrap Fusion Lumos  
259 was operated in positive ion mode with a spray voltage of 2.4 kV and capillary temperature of 275 °C.  
260 Full scan MS spectra with a mass range of 375–1500 m/z were acquired in profile mode using a  
261 resolution of 60,000 with a maximum injection time of 50 ms, AGC operated in standard mode and a RF  
262 lens setting of 30 %.

263        Fragmentation was triggered for 3 s cycle time for peptide like features with charge states of 2–  
264 7 on the MS scan (data-dependent acquisition). Precursors were isolated using the quadrupole with a  
265 window of 0.7 m/z and fragmented with a normalized collision energy of 36 %. Fragment mass spectra  
266 were acquired in profile mode and a resolution of 30,000 in profile mode. Maximum injection time was  
267 set to 94 ms or an AGC target of 200 %. The dynamic exclusion was set to 60 s.

### 268 **LC-MS/MS analysis of cell lysates**

269        Peptides were separated using an Ultimate 3000 nano RSLC system (Dionex) equipped with a  
270 trapping cartridge (Precolumn C18 PepMap100, 5 mm, 300 µm i.d., 5 µm, 100 Å) and an analytical  
271 column (Acclaim PepMap 100. 75 × 50 cm C18, 3 mm, 100 Å) connected to a nanospray-Flex ion  
272 source. The peptides were loaded onto the trap column at 30 µl per min using solvent A (0.1 % formic  
273 acid) and eluted using a gradient from 2 to 80 % Solvent B (0.1 % formic acid in acetonitrile) over 2 h at  
274 0.3 µl per min (all solvents were of LC-MS grade). The Orbitrap Fusion Lumos was operated in positive  
275 ion mode with a spray voltage of 2.4 kV and capillary temperature of 275 °C. Full scan MS spectra with  
276 a mass range of 375–1500 m/z were acquired in profile mode using a resolution of 120,000 with a  
277 maximum injection time of 50 ms, AGC operated in standard mode and a RF lens setting of 30 %.

278        Fragmentation was triggered for 3 s cycle time for peptide like features with charge states of 2–  
279 7 on the MS scan (data-dependent acquisition). Precursors were isolated using the quadrupole with a  
280 window of 0.7 m/z and fragmented with a normalized collision energy of 34 %. Fragment mass spectra  
281 were acquired in profile mode and a resolution of 30,000 in profile mode. Maximum injection time was  
282 set to 94 ms or an AGC target of 200 %. The dynamic exclusion was set to 60 s.

### 283 **Data analysis**

284        Acquired data were analyzed using IsoBarQuant (Franken *et al*, 2015) and Mascot V2.4 (Matrix  
285 Science) using a reverse UniProt FASTA *Saccharomyces cerevisiae* database (UP000002311)  
286 including common contaminants and the following Rtn1-myc-3C-3xFLAG-tagged (bait) protein  
287 employed for the enrichment of subcellular membranes:

288  
289 sp|P1707\_RE|P1707\_RE  
290 MSASAQHSQAQQQQKSCNCDLLLWRNPVQTGKYFGGSLALLLILKKNLITFFLKVAYTILFTTGS  
291 EFVSKLFLGQGLITKYGPKECPNIAGFIKPHIDEALKQLPVFQAHIRKTVFAQVPKHTFKTAVALLHFK  
292 FSWFSIWTIVFVADIFTFTLPVIYHSYKHEIDATVAQGVEISKQKTQEFSSQMAECKTKPYLDKVESKLG  
293 ISNLVKSKTAPVSSSTAGPQTASTSKLAADVPLEPESKAYTSSAQVMPEVPQHEPSTTQEFNVDELSNE

294 LKKSTKNLQNELEKNNAGGGGGEGEQLISEEDLGSGLVLFQGPVSGDYKDHDGDYKDHDIDYKDD  
295 DDK

296 The following modifications were taken into account: Carbamidomethyl (C, fixed), TMT10plex  
297 (K, fixed), Acetyl (N-term, variable), Oxidation (M, variable) and TMT10plex (N-term, variable).  
298 TMT16plex labeled samples The TMT16plex (K, fixed) and TMT16plex (N-term, variable) labels were  
299 considered as modifications. The mass error tolerance for full scan MS spectra was set to 10 ppm and  
300 for MS/MS spectra to 0.02 Da. A maximum of 2 missed cleavages were allowed. A minimum of 2 unique  
301 peptides with a peptide length of at least seven amino acids and a false discovery rate below 0.01 were  
302 required on the peptide and protein level (Savitski *et al*, 2015).

### 303 **ER enrichment calculation based on untargeted proteomics**

304 IsobarQuant output data were analyzed on a gene symbol level in R (<https://www.R-project.org>)  
305 using in-house data analysis pipelines. In brief, data was filtered to remove contaminants and proteins  
306 with less than 2 unique quantified peptide matches. Subsequently, protein reporter signal sums were  
307 normalized within the TMT set using the vsn package (Huber *et al*, 2002) and fold changes were  
308 calculated over vsn-corrected values in the total lysate channel of the respective replicate. Gene  
309 ontology (GO) term annotations were retrieved from Uniprot (accessed 8.3.2021) (Supplementary Table  
310 S1). Compartment-specific unique annotations were obtained by aggregating the following GO terms:  
311 GO:0005576, GO:0031012 to *extracellular region*; GO:0005886 to *plasma membrane*; GO:0005737,  
312 GO:0005829 to *cytoplasm*; GO:0005739 to *mitochondrion*; GO:0005777 to *peroxisome*; GO:0005783  
313 to *ER*; GO:0005794 to *Golgi apparatus*; GO:0005634, GO:0005654, GO:0005730 to *nucleus*;  
314 GO:0031965 to *nuclear membrane*; GO:0005773, GO:0000324, GO:0005774 to *vacuole*; and  
315 GO:0005811 to *lipid droplet*.

### 316 **Molecular dynamics (MD) simulations**

317 All-atom MD simulations were set up and carried out using the GROMACS software (Páll *et al*,  
318 2020). Lipid topologies and structures were taken from the CHARMM-GUI web server (Jo *et al*, 2009).  
319 Bilayers were then generated using MemGen (Schott-Verdugo & Gohlke, 2019). Three different ER  
320 compositions were used (Supplementary Table S2) as well as a reference membrane composed of 50  
321 % POPC and 50 % DOPC. Each system contained 100 lipids per leaflet and 60 water molecules per  
322 lipid. Na<sup>+</sup> and Cl<sup>-</sup> ions were added to reach an ionic concentration of 0.15 M. Taken together each system  
323 contained approximately 60000 atoms. Simulations were carried out using the CHARMM36m forcefield  
324 (Huang *et al*, 2017) and the CHARMM-modified TIP3P water model (Jorgensen *et al*, 1998). The system  
325 was kept at 303 K using velocity-rescaling (Bussi *et al*, 2007). Semi-isotropic pressure coupling at 1.0  
326 bar was applied using the Berendsen barostat (Berendsen *et al*, 1984) for equilibration and the  
327 Parrinello-Rahman barostat using a coupling time constant of  $\tau = 2$  ps (Parrinello & Rahman, 1981)  
328 during production runs. Electrostatic interactions were calculated using the particle-mesh Ewald method  
329 (Essmann *et al*, 1995). A cutoff of 1.2 nm according to CHARMM36 specifications (Best *et al*, 2012) was  
330 used for the non-bonded interactions, while the Lennard-Jones interactions were gradually switched off  
331 between 1.0 and 1.2 nm. Bond constraints involving hydrogen atoms were implemented using LINCS

332 (Hess, 2008), thus a 2 fs time step was chosen. Each system was initially equilibrated for 50 ns followed  
333 by three independent production runs of at least 700 ns.

334 For the analysis, the first 100 ns of each production run was discarded. Mass density profiles were  
335 calculated along the z-axis (membrane normal) using the Gromacs module gmx density. The membrane  
336 thickness was extracted from the density profiles using a threshold of 500 kg/m<sup>3</sup>. Errors were obtained  
337 by averaging and calculating the SEM over independent simulations segments. An in-house modified  
338 version of the Gromacs module freevolume was used to calculate the free volume profile as a function  
339 of z. The module estimates the accessible free volume by inserting probe spheres of radius R at random  
340 positions, while testing the overlap with the Van der Waals radii of all simulated atoms. Here, we used  
341 a probe radius of R=0, thereby obtaining the total free volume. Errors for each individual simulation were  
342 obtained by multiple independent insertion rounds carried out by gmx freevolume, the overall error for  
343 the averaged curves was calculated using standard error propagation. Surface packing defects were  
344 calculated using the program PackMem (Gautier *et al*, 2018). The program uses a grid-based approach  
345 to identify surface defects and distinguishes between deep and shallow defects based on the distance  
346 to the mean glycerol position (everything below a threshold of 1 Å was considered a deep defect). By  
347 fitting a single exponential to the obtained defect area distribution, the defect size constant was  
348 determined for each defect type. To achieve converged results, trajectory snapshots taken every 100 ps  
349 were used. Error estimation was conducted by block averaging dividing each simulation into 3 blocks of  
350 equal size and calculating the SEM over all blocks.

### 351 **RNA preparation, cDNA synthesis, and RT-qPCR analysis**

352 UPR activation was measured by determining the mRNA levels of spliced *HAC1*, *PDI*, and  
353 *KAR2*. For each experimental condition total RNA was prepared from 5 OD<sub>600</sub> units of cells using the  
354 RNeasy Plus RNA Isolation Kit (Qiagen). The synthesis of cDNA was performed using 500 ng of  
355 prepared RNA, Oligo(dT) primers, and the Superscript II RT protocol (Invitrogen).

356 RT-qPCR was performed using the ORA qPCR Green ROX L Mix (HighQu) and a Mic qPCR cycler (Bio  
357 Molecular Systems) in a 20 µl reaction volume. Following primers were used at a final concentration of  
358 400 nM to determine the CT values of the housekeeping gene *TAF10* and genes of interest: spliced  
359 *HAC1* forward: 5'-TACCTGCCGTAGACAACAAC-3'; spliced *HAC1* reverse: 5'-  
360 ACTGCGCTTCTGGATTAC-3'; *PDI* forward: 5'-TTCCCTCTATTTGCCATCCAC-3'; *PDI* reverse: 5'-  
361 GCCTTAGACTCCAACACGATC-3'; *KAR2* forward: 5'-TGCTGTCGTTACTGTTCCCTG-3'; *KAR2*  
362 reverse: 5'-GATTTATCCAAACCGTAGGCAATG-3'; *TAF10* forward: 5'-  
363 ATATTCCAGGATCAGGTCTTCCGTAGC-3'; *TAF10* reverse: 5'-  
364 GTAGTCTTCTCATTCTGTTGATGTTGTTGTTG-3'.

365 The qPCR program consisted of the following steps: (1) 95 °C, 15 min; (2) 95 °C, 20 s; (3) 62 °C, 20 s;  
366 (4) 72 °C, 30 s; and (5) 72 °C, 5 min; steps 2–4 were repeated 40 times. We used the comparative  
367  $\Delta\Delta CT$  method with normalization to *TAF10* CT values to quantify the levels of spliced *HAC1*, *PDI*, and  
368 *KAR2* mRNA.

## 369 **Results**

### 370 ***Creation of a rapid and clean approach for yeast organelle isolation, MemPrep***

371 In the past organelle isolation in yeast has been carried out predominantly by differential  
372 sedimentation and density centrifugation (Zinser & Daum, 1995; Schneiter *et al*, 1999). Affinity  
373 purification methods that work well in mammalian cells cannot be translated easily into yeast work,  
374 especially when the organelle-of-interest forms extensive membrane contact sites (Takamori *et al*, 2006;  
375 Klemm *et al*, 2009; Surma *et al*, 2011; Abu-Remaileh *et al*, 2017). We sought to create a yeast-specific  
376 affinity purification method for obtaining clean organelle fractions, MemPrep. We reasoned that  
377 important aspects of MemPrep would be the capacity to rapidly bind organellar membranes with high  
378 specificity and the ability to release them selectively after intense washing. Hence, we constructed a  
379 tagging-cassette that can equip an open reading frame in yeast with a sequence encoding for a C-  
380 terminal bait tag comprising a myc epitope, a recognition site for the human rhinovirus (HRV) 3C  
381 protease, and three repeats of the FLAG epitope (Figure 1A). Following proof of concept of the validity  
382 of MemPrep (see below) and to enable our approach to be widely used by the yeast community  
383 regardless of which organelle is of interest, we created a systematic collection of strains in which every  
384 yeast protein is tagged with the bait sequence (see some examples for each organelle in Supplementary  
385 Figure S1A). To do this we used the SWAp Tag (SWAT) approach (Yofe *et al*, 2016; Meurer *et al*, 2018;  
386 Weill *et al*, 2018) coupled with automated library creation strategies (Tong & Boone, 2006; Weill *et al*,  
387 2018). The library or any individual strain are freely distributed.

### 388 ***MemPrep yields highly enriched ER membrane vesicles***

389 To showcase MemPrep we first focused on the largest organelle in the cell, the ER, which is a  
390 particularly challenging target. It forms physical contact sites with almost every other membrane-bound  
391 organelle (English & Voeltz, 2013) and previous attempts to isolate ER membranes suffered from  
392 significant mitochondrial contaminations (Schneiter *et al*, 1999; Reglinski *et al*, 2020). We used Rtn1 as  
393 a bait for ER proteins since it is a small and highly abundant reticulon protein (~37,100 copies per cell),  
394 which stabilizes membrane curvature in the tubular ER (Ghaemmaghami *et al*, 2003; Voeltz *et al*,  
395 2006). Several experimental factors are important to ensure the successful isolation of ER membranes  
396 (Figure 1A): Firstly, cells are mechanically disrupted, thereby minimizing potential artifacts from the  
397 ongoing lipid metabolism and ER stress that occurs during the digestion of the cell wall under reducing  
398 conditions (Zinser & Daum, 1995; Klemm *et al*, 2009; Reinhard *et al*, 2020). Secondly, large organellar  
399 fragments are disrupted by sonication prior to the immuno-isolation because small organellar fragments  
400 are less likely to form physical contacts to other organelles. Thirdly, physical membrane contacts  
401 between vesicles are destabilized by urea-containing wash buffers. And fourthly, the isolated membrane  
402 vesicles are selective eluted from the affinity matrix thereby providing a straightforward coupling to  
403 various mass spectrometry-based analytical platforms following previous paradigms (Klemm *et al*,  
404 2009).

405 Enrichments of organellar membranes relies first on differential centrifugation and only then on  
406 an affinity isolation. To decide on the exact fraction best to utilize for membrane pull downs, we  
407 performed immunoblotting experiments after differential centrifugation (Figure 1B). Membrane markers

408 for the ER (Dpm1), mitochondria (Por1), endosomes (Ypt7, Pep12), the vacuole (Vac8), and the plasma  
409 membrane (Gas1) were all enriched in the pellets of a centrifugation at 12,000 x g (P12) and 100,000 x g  
410 (P100), while the light microsomal 40 kDa protein (40kDa) was found predominantly found in the P100  
411 fraction (Figure 1B). The marker for the outer mitochondrial membrane (Por1) was significantly enriched  
412 in P12 relative to P100 (Figure 1B). To minimize contaminations from mitochondrial membranes we  
413 decided to use the crude microsomal P100 fraction for isolating ER membrane vesicles. Of note, a  
414 substantial fraction of the ER-luminal chaperone Kar2 was found in the supernatant after centrifugation  
415 at 100,000 x g (S100), hence suggesting that at least some of the ER-luminal contents are released  
416 during cell disruption.

417 To ensure that our choice of P100 is optimal and to uncover the extent of loss of ER luminal  
418 proteins we followed the entire process from cell disruption to the elution of the isolated vesicles in a  
419 control experiment using fluorescence microscopy. To this end, we used cells expressing not only an  
420 ER bait protein, but also an ER-targeted, superfolder-GFP variant equipped with a HDEL sequence for  
421 ER retrieval (Figure 1C) (Lajoie *et al*, 2012). By following the fluorescent ER-luminal marker, we realized  
422 that the crude microsomal P100 fraction contains clumps of both GFP-positive and GFP-negative  
423 vesicles (Figure 1C; P100, white arrowhead). Due to the loss of ER luminal proteins, the GFP-negative  
424 vesicles could be derived from the ER but may also be from other organelles. Regardless, clumps of  
425 vesicles would make isolation impossible, and hence we decided to separate them using ultrasound  
426 (Figure 1A). Indeed, this eliminated the presence of aggregated vesicles (Figure 1C).

427 Sonication transiently disrupts membranes and might induce fusion of ER membrane vesicles  
428 with non-ER membranes. Because this would obscure our measurement of the ER membrane  
429 composition, we performed control experiments to rule out this possibility. We utilized small unilamellar  
430 vesicles with a fusogenic lipid composition (POPC/DOPE/POPS/Erg/NBD-PE/Rho-PE at  
431 61/20/5/10/2/2 mol%, respectively) that includes two fluorescent lipids forming a Förster resonance  
432 energy transfer (FRET) pair. We sonicated these synthetic liposomes in the presence of excess  
433 microsomal membranes (P100). Because fusion between the synthetic liposomes and microsomal  
434 membranes would 'dilute' the fluorescent lipid analogs, a decrease of the relative FRET efficiency would  
435 be expected upon mixing of membrane contents. However, the 10 cycles of sonication used in MemPrep  
436 for dissociating vesicle aggregates do not cause a substantial membrane mixing. Only after 100 cycles,  
437 which also leads to sample warming, or in the presence of Ca<sup>2+</sup> and PEG, which triggers membrane  
438 fusion, we observed lower FRET efficiencies indicative for lipid exchange and membrane fusion  
439 (Supplementary Figure S1B). While we expect that some ER-luminal proteins are released during the  
440 sonication step, our data exclude the possibility the dissociation of aggregated vesicles causes a  
441 significant degree of membrane mixing from fusion and/or lipid exchange.

442 After having optimized sample homogenization, we turned our attention to the immuno-isolation  
443 procedure. We decided on Protein G-coated, magnetic dynabeads decorated with anti-FLAG antibodies  
444 at sub-saturating concentrations. A low density of antibodies is required to lower steric hindrances and  
445 unwanted avidity effects, which might eventually impede the elution of membrane vesicles from the  
446 matrix. The capturing of GFP-positive, ER-derived vesicles to the affinity matrix was validated by  
447 fluorescence microscopy (Figure 1C, bind). After extensive washing with urea-containing buffers, the  
448 isolated vesicles were eluted (Figure 1C; eluate) by cleaving the bait tag as validated by immunoblotting



449 using anti-myc antibodies (Figure 1D; eluate). The isolated membrane material was harvested and  
450 concentrated by ultracentrifugation (264,360 x g, 2 h, 4 °C) (Figure 1A). Immunoblotting demonstrated  
451 the co-purification of the bait (Rtn1) with other ER membrane proteins (Dpm1, Sec61) (Figure 1D), while  
452 most of the ER-luminal chaperone Kar2 is lost during the isolation. Remarkably, all markers for other  
453 organelles including the light microsomal marker 40 kDa protein (40kDa) and the mitochondrial marker  
454 Por1 were absent in the final isolate (Figure 1D). This shows that the isolation of ER-derived membranes  
455 via MemPrep is free of considerable contaminations.

456 While loss of several specific organelle markers by immunoblotting is often used as a 'gold  
457 standard', we decided to go one step further. Consequently, we measured the level of cleanliness of our  
458 preparations by TMT-multiplexed, untargeted protein mass spectrometry to estimate the enrichment of  
459 the ER membrane proteins in the immuno-isolate relative to the cell lysate (Figure 1E). We compared  
460 the enrichment of the ER with that of other organelles using a total of 1591 proteins uniquely annotated  
461 for cellular compartments with gene ontology terms (GO terms) (Figure 1E, Supplementary Figure S1C,  
462 Supplementary Table S1). The median enrichment of 178 ER-specific proteins was 25.7-fold in the  
463 immuno-isolate over the cell lysate, which is also consistent with semi-quantitative, immunoblotting data  
464 (Supplementary Figure S1D). Most notably, quantitative proteomics approach revealed the efficient  
465 depletion of cytosolic (cytoplasm), inner nuclear membrane, and even mitochondrial proteins, which  
466 represented a major contaminant in microsome preparations in the past (Schneider *et al*, 1999; Reglinski  
467 *et al*, 2020). Hence, we have isolated ER-derived membrane vesicles from yeast with unprecedented  
468 purity.

### 469 ***The lipid composition of the ER***

470 Previous attempts of establishing subcellular membrane compositions in yeast have either not  
471 included the ER or yielded insufficiently pure preparations (Schneider *et al*, 1999; Reglinski *et al*, 2020).  
472 Having established the isolation of ER-derived membranes, we were interested in determining their lipid  
473 composition using state-of-the-art, quantitative lipidomics (Figure 2A-C, Supplementary Table S3). We  
474 found that the ER membrane features (compared to the lipid composition of the corresponding cell  
475 lysate) 1) substantially lower levels of neutral storage lipids (ergosterol esters (EEs) and triacylglycerols  
476 (TAGs)), 2) significantly more diacylglycerol (DAG), phosphatidylcholine (PC) and  
477 phosphatidylethanolamine (PE), but 3) less phosphatidylinositol (PI) lipids. Hence, the ER maintains a  
478 characteristic lipid composition even though it readily exchanges membrane material with other  
479 organelles (Wong *et al*, 2019). Remarkably, the level of ergosterol in the ER (9.7 mol%) is barely distinct  
480 from the level in whole cells (10.5 mol%) (Figure 2A) or in the *trans*-Golgi network/endosome (TGN/E)  
481 system (9.8 mol%) (Klemm *et al*, 2009), but much lower than in the plasma membrane (>44 mol%)  
482 (Surma *et al*, 2011). The absence of a robust sterol gradient in the early secretory pathway has important  
483 implications for the sorting of transmembrane proteins (Ridsdale *et al*, 2006; Lorent *et al*, 2017) and is  
484 consistent with a direct ER-to-Golgi delivery via membrane bridges (Weigel *et al*, 2021). Furthermore,  
485 we find complex sphingolipids such as inositol-phosphorylceramide (IPC), mannosyl-IPC (MIPC), and  
486 mannosyl-di-(IP)C (M(IP)<sub>2</sub>C) at considerable levels in the ER (Figure 2B). Because these lipids are  
487 synthesized only in the Golgi apparatus, our finding suggests a substantial retrograde flux of complex  
488 sphingolipids from the Golgi complex to the ER. It is likely that these lipids are delivered to the ER via



489 COP-I vesicles together with ER-resident proteins bound to the HDEL-receptor (Semenza *et al*, 1990;  
490 Aguilera-Romero *et al*, 2008). A closer look at the fatty acyl chain composition of ER lipids reveals a  
491 particularly low level (<5 mol%) of tightly-packing, saturated lipids and a significant enrichment of loosely  
492 packing, unsaturated lipids (Figure 2C). Loose lipid packing and low membrane rigidity are likely  
493 contributing to the remarkable ability of the ER to accept and fold the entire diversity of transmembrane  
494 proteins differing substantially in shape and hydrophobic thicknesses (Sharpe *et al*, 2010; Quiroga *et al*,  
495 2013; Lorent *et al*, 2020). Future work will be dedicated to quantifying also phosphorylated PI species  
496 such as phosphatidylinositol-4, 5-bisphosphate (PIP2) or phosphatidylinositol-3, 4, 5-triphosphate  
497 (PIP3).

498 In summary, our molecular analysis of the ER membrane reveals several surprising insights,  
499 which are nevertheless consistent with our current understanding of the properties and functions of the  
500 ER. The robustness and reproducibility of our MemPrep approach coupled to lipidomic platforms is  
501 demonstrated by the near perfect correlation of lipid abundances reported in four independent  
502 experiments (Figure 2D, E).

### 503 ***Stable lipid compositions after cell lysis contrasts ER lipid remodeling in living cells***

504 While our isolation process is shorter than many previously employed methods for organelle  
505 purification, it still takes 8 h from cell lysis to finish. Hence, we wanted to exclude that ongoing lipid  
506 metabolism during the isolation procedure distorts the measured lipid composition. Consequently, we  
507 performed a control experiment in which we split a crude microsome preparation (P100) into two equal  
508 samples. The first sample was directly snap-frozen in liquid N<sub>2</sub> while the second one frozen only after  
509 an incubation at 4 °C for 8 h. A comparison of the two samples revealed remarkably similar lipid  
510 compositions (Supplementary Figure S2A-C, Supplementary Table S3). Only the low abundant lyso-PC,  
511 lyso-PE, and lyso-PI lipids showed some differences (Supplementary Figure S2B) thereby suggesting  
512 a loss of lysolipids over time consistent with their role as intermediates of lipid degradation (Harayama  
513 & Riezman, 2018). The overall stability of the lipidome, however, supports the view that the lipid  
514 composition of the immuno-isolated ER membranes reflects the original, *in vivo* lipid composition of the  
515 ER.

516 To investigate the responsiveness of the ER to metabolic perturbation (Zinser *et al*, 1991; Henry  
517 *et al*, 2012), we immuno-isolated ER-derived membranes from cells cultured in synthetic complex  
518 dextrose (SCD) with or without additional 2 mM choline and determined the resulting lipid composition  
519 (Supplementary Figure S3A-C, Supplementary Table S3). Choline is a lipid metabolite that can be  
520 activated to CDP-choline and then transferred onto diacylglycerol (DAG) to yield PC (Supplementary  
521 Figure S3D) (Kennedy & Weiss, 1956; Henry *et al*, 2012). Somewhat expectedly, the ER of choline-  
522 challenged cells features substantially higher levels of PC and lower levels of PE, which is also reflected  
523 by an increase of the PC-to-PE ratio from ~1.1 to ~2.4 (Supplementary Figure S3A). While the  
524 abundance of most other lipid classes including ergosterol, DAG, phosphatidic acid (PA) and IPC are  
525 unaffected by the metabolic challenge, we also observe mildly increased abundances of PS and MIPC,  
526 and mildly decreased levels of PI. Intriguingly, the increased PC-to-PE ratio of ~2.4 in choline-  
527 challenged cells is not associated with changes in lipid saturation (Supplementary Figure S3C). Plotting  
528 the choline-induced changes of the lipid fatty acyl chains reveals only minimal changes: the average

529 chain length of PC is decreasing, while it is increasing for PE, PS, and PI (Supplementary Figure S3E).  
530 Even though the metabolic challenge substantially perturbs the PC-to-PE ratio, it does not trigger the  
531 UPR, as judged by RT-qPCR experiments quantifying the abundance of the UPR-specific, spliced *HAC1*  
532 mRNA and that of the two UPR target genes *KAR2* and *PDI1*. This is in stark contrast to inositol-  
533 depletion, which robustly activates the UPR (Supplementary Figure S3F) (Cox *et al*, 1997; Promlek *et*  
534 *al*, 2011). Together, these data highlight the accuracy by which MemPrep can measure even slight  
535 differences in organelle lipid composition on the one hand and the remarkable versatility of the lipid  
536 modifying enzymes to maintain similar membrane properties despite changes in head-group  
537 composition, on the other.

### 538 ***A molecular fingerprint of lipid bilayer stress during inositol-depletion***

539 Having shown the ability of the ER to adjust its membrane composition, we turned our attention  
540 to the stressed ER. Lipid bilayer stress is a collective term for aberrant ER membrane compositions  
541 activating the UPR (Ho *et al*, 2018; Radanović & Ernst, 2021). The acute depletion of inositol causes a  
542 robust, but transient UPR without triggering a substantial accumulation of misfolded proteins  
543 (Supplementary Figure S3F) (Cox *et al*, 1997; Promlek *et al*, 2011; Lajoie *et al*, 2012). By combining  
544 MemPrep with a quantitative lipidomics platform, we set out to define, for the first time, the molecular  
545 fingerprints of lipid bilayer stress in the ER (Figure 3A, B).

546 We found that inositol-depletion causes a substantial reduction of inositol-containing PI lipids  
547 (Figure 3A, B, Supplementary Table S3). This is accompanied by a drastic accumulation of CDP-DAG  
548 lipids, which serve as direct precursors for PI synthesis via *Pis1* (Henry *et al*, 2012) (Figure 3A, B). Even  
549 the penultimate precursor of PI synthesis, PA, is found at significantly increased levels in the ER upon  
550 inositol-depletion (Supplementary Figure S3A, D). Sphingolipids, whose hydrophilic lipid headgroups  
551 also contain inositol, are not depleted under this condition (Figure 3B). This implies a strict prioritization  
552 for sphingolipid biosynthesis over PI synthesis when inositol becomes limiting. Overall, the molecular  
553 lipid fingerprint of the lipid bilayer stress caused by inositol-depletion is characterized by substantial  
554 changes in the abundance of anionic lipids, PI in particular (Figure 3A, B).

555 We further dissected the compositional changes of the ER membrane lipidome upon inositol-  
556 depletion at the level of the lipid acyl chains and observed a global trend toward shorter and more  
557 saturated glycerophospholipids (Figure 3D, E). While these changes are likely to fine-tune the  
558 physicochemical properties of the ER membrane, it is unlikely that these changes alone are sufficient  
559 to trigger the UPR by activating *Ire1* (Halbleib *et al*, 2017). Hence, it is tempting to speculate that the  
560 overall reduction of anionic lipids, which directly affects the negative surface charge density of the ER  
561 (Supplementary Figure S4A, G), contributes to lipid bilayer stress. While a mechanistic role of individual  
562 lipids and collective membrane properties on UPR activation can be established only *in vitro*, our data  
563 provide a quantitative basis for studying the contribution of lipids and bulk membrane properties to  
564 chronic ER stress after a biochemical reconstitution of UPR transducers in native-like membrane  
565 environments.

### 566 ***Lipid bilayer stress caused by proteotoxic agents Tunicamycin (TM) and Dithiothreitol (DTT)***

567 Prolonged proteotoxic stresses activate the UPR via a membrane-based mechanism (Promlek  
568 *et al*, 2011; Váth *et al*, 2021) but the molecular underpinnings remain unknown. To address this gap, we  
569 exposed exponentially growing cells for 4 h to either 2 mM DTT or 1.5 µg/ml TM in SCD medium, isolated  
570 ER-derived membranes via MemPrep, and performed comprehensive lipidomic (Figure 4) and  
571 proteomic analyses (Figure 5). Our goal was establishing ER membrane compositions, which are known  
572 to trigger the UPR, rather than studying the impact of proteotoxic stress and UPR signaling on the  
573 membrane composition.

574 Surprisingly and despite each stress being completely different in its mechanism of action, the  
575 ER membranes isolated from either DTT- or TM-stressed cells have virtually identical lipid compositions,  
576 both profoundly distinct from the unstressed ER (Figure 4A, B, Supplementary Table S3). In fact,  
577 principal component analysis (PCA) shows clear separation between the stressed and unstressed ER,  
578 whilst highlighting the self-similarity of individual replicates (Supplementary Figure S4B). The two  
579 principal components PC1 and PC2 together defined >62 % of the lipidomic variation across all samples,  
580 with PC1 comprising 35.8 % of that variance. Notable segregation along PC1 was observed between  
581 the unstressed and the TM- and DTT-stressed conditions. With respect to the lipid composition, the  
582 stressed ER features higher levels of neutral storage lipids (EEs and TAGs) (Figure 4A), which may be  
583 caused by a reduced growth rate and an increased flux of fatty acids into storage lipids, as previously  
584 suggested, or a depletion of lipid metabolites from the medium (Listenberger *et al*, 2003; Vevea *et al*,  
585 2015; Henne *et al*, 2018; Reinhard *et al*, 2020). The unusually high level of the lipid metabolic  
586 intermediates CDP-DAG and DAG in the stressed ER is consistent with these possibilities (Figure 4A,  
587 B). Notably, we confirmed that DTT and TM indeed trigger the UPR by RT-qPCR experiments (Figure  
588 4C). These control experiments also show that the presence of the bait in the ER does not perturb UPR  
589 activation under these conditions (Figure 4C).

590 Compared to the PC-to-PE ratio of 1.0 in the unstressed ER, both the DTT- and the TM-  
591 stressed ER feature strikingly increased PC-to-PE ratios of 2.8 and 3.1, respectively, similar to what we  
592 noticed for the choline challenge (Figure 4A; Supplementary Figure S3A-C). Because the aberrantly  
593 high PC-to-PE ratio of ~2.4 observed upon choline challenge (Supplementary Figure S3A) does not  
594 activate the UPR (Supplementary Figure S3F), while inositol-depletion does so even without perturbing  
595 the PC-to-PE ratio (Figure 3A, Supplementary Figure S3F), it is unlikely that increased PC-to-PE ratios  
596 observed under conditions of prolonged proteotoxic stresses can directly trigger the UPR (Fu *et al*, 2011;  
597 Gao *et al*, 2015; Ho *et al*, 2020; Ishiwata-Kimata *et al*, 2022). However, in both the DTT- and the TM-  
598 stressed ER, we find reduced levels of negatively charged, inositol-containing lipids (PI, LPI, IPC, MIPC)  
599 (Figure 4A, B), which is only partially compensated by mildly increased levels of PA and CDP-DAG  
600 (Figure 4A, B; Supplementary Figure S4A). Furthermore, we find that the glycerophospholipids of the  
601 stressed ER are significantly longer and more saturated compared to the unstressed ER (Figure 4D-F).  
602 Because Ire1 uses a hydrophobic mismatch-based mechanism (Halbleib *et al*, 2017), it is possible that  
603 these mild changes in the acyl chain region synergize with the reduction of anionic lipids in the ER  
604 membrane to mount a robust UPR. The molecular fingerprints of lipid bilayer stress therefore provide  
605 an important framework for dissecting the role of anionic lipids in UPR activation *in vitro*.

606 Based on the detailed molecular information, we established ER-like lipid compositions  
607 mimicking the stressed and unstressed ER using twelve commercially available lipids (Supplementary

608 Table S2). The ER-like lipid mixtures were chosen to match for each condition the lipid class  
609 composition, the overall degree of lipid saturation, and the acyl chain composition in each individual lipid  
610 class. We performed all-atom molecular dynamics (MD) simulations on these ER-like compositions  
611 (Supplementary Figure S4C). Remarkably, all three ER-like lipid mixtures are substantially different to  
612 a lipid bilayer composed only of PC lipids with respect to membrane thickness (Supplementary Figure  
613 S4D), lipid packing defects (Supplementary Figure S4E), and the free volume profile (Supplementary  
614 Figure S4F). A particularly intriguing difference between the stressed and unstressed ER-like mixtures  
615 is the significantly different distribution of positive and negative charges in the water-membrane interface  
616 (Supplementary Figure S4G), which reflects the different abundance of anionic lipids in the stressed ER  
617 (Supplementary Figure S4A). Hence, beyond establishing fingerprints of the stressed ER, we provide a  
618 resource for studying protein-lipid and protein-membrane interactions, which will help studying the  
619 structure and function of membrane proteins in realistic, native-like membrane environments.

### 620 ***Proteomic analysis of the DTT- and TM-stressed ER***

621 Our lipidomic analysis uncovered huge differences between the stressed and the unstressed  
622 ER. To compare these with the proteomic changes we used MemPrep and quantitative proteomics to  
623 uncover proteomic changes in the stressed ER. Prior to subjecting microsomal membranes to the  
624 immuno-isolation procedure, we washed the microsomes with sodium carbonate to remove loosely  
625 attached peripheral proteins and contaminating cytosolic proteins. A total of 2952 proteins were robustly  
626 detected in three biological replicates of both the stressed and unstressed ER. Globally, the ER  
627 proteomes of DTT- and TM-stressed cells are largely similar (Pearson correlation coefficient  $r = 0.82$ ,  
628 Supplementary Figure S5A). We find that prolonged proteotoxic stress is associated with a substantial  
629 remodeling of the ER proteome and the accumulation of 1) UPR target proteins, 2) lipid metabolic  
630 enzymes, 3) membrane trafficking machineries including cargoes, as well as 4) cell wall proteins and  
631 cell wall biogenesis factors. Notably, the accumulation of proteins in the stressed ER can be due to a  
632 transcriptional upregulation via the UPR or due to a mislocalization of non-ER proteins to the ER.

633 UPR targets found accumulated in the stressed ER include ER-luminal (co-)chaperones such  
634 as Kar2, Sil1, and Lhs1 as well as proteins involved in disulfide bridge formation such as Eug1 and Ero1  
635 (Figure 5A, B). Most profoundly accumulated is Uli1, a known UPR target of unknown function, and  
636 Yet2, a homolog of the mammalian BAP31, which has been implicated in ERAD (Wakana *et al*, 2008)  
637 and the formation of ER-mitochondria contacts (Namba, 2019).

638 Prolonged proteotoxic stress activates the UPR via a membrane-based mechanism (Promlek  
639 *et al*, 2011) and it is associated with the accumulation of various lipid metabolic enzymes in the ER  
640 thereby affecting sterols (e.g. Pcy2 and Skm1) and the metabolism of PI and PC (e.g. Ino1 and Gde1)  
641 (Figure 5A, B). Also the phospholipases Plb1 and Plb3, which are crucial for lipid fatty acyl chain  
642 remodeling, accumulate in the ER (Figure 5A, B) (Renne *et al*, 2015). The accumulation of the  
643 mitochondrial phospholipase Cld1 (active towards CL) in the ER, suggests that protein sorting and  
644 mitochondrial import are disrupted by proteotoxic stresses. Also, the fatty acyl-coenzyme A (CoA)  
645 diphosphatase Scs3 accumulates in the stressed ER. This homolog of the mammalian FIT2 is crucial  
646 for maintaining ER structure during stress by enabling a normal storage of neutral lipids in lipid droplets  
647 (Yap *et al*, 2020; Becuwe *et al*, 2020). The grossly perturbed abundance of various lipid metabolic

648 enzymes in the stressed ER is likely to contribute to the lipidomic changes observed for the stressed  
649 ER (Figure 4) and may, at least in part, reflect homeostatic responses to maintain ER membrane  
650 function upon stress.

651 Aberrant protein folding in the ER prevents the ER exit of various secretory and membrane  
652 proteins with major consequences on the entire secretory pathway (Travers *et al*, 2000; Jonikas *et al*,  
653 2009). In fact, crucial components of the COP-II (e.g. Emp46, Sly1, and Pib3) and COP-I (Ret2)  
654 pathways accumulate in the stressed ER. Likewise, the HDEL receptor Erd2 (Semenza *et al*, 1990) and  
655 the mannosyl-transferase Ktr1 involved in N- and O-linked glycosylations accumulate in the stressed  
656 ER. It is tempting to speculate that the aberrant ER localization of the membrane trafficking machinery  
657 contributes to the membrane-based activation of the UPR under conditions of prolonged proteotoxic  
658 stress.

659 Particularly striking for the stressed ER is the substantial accumulation of cell wall components,  
660 cell wall biogenesis factors (e.g. Cis3, Pun1, Crh1, and Exg1), and GPI-anchored proteins (e.g. Yps3  
661 and Yps1).

### 662 ***DTT and TM have similar yet distinct impact of the ER proteome***

663 To functionally annotate the complex proteomic changes, we determined the enrichment of  
664 gene ontology terms (GO terms) in all upregulated proteins (Figure 5C). Most enriched GO terms  
665 regarding cellular components are shared for both sample sets derived from the DTT- and TM-stressed  
666 ER (extracellular region, vacuole, vacuolar lumen, endoplasmic reticulum lumen, vesicle coat)  
667 consistent with a general block of secretion. However, this analysis also reveals qualitative differences  
668 between DTT- and TM-stressed ER. While DTT seems to act more prominently on vesicular transport  
669 and autophagic processes (regulation of macroautophagy) (Figure 5C), TM seems to affect more  
670 selectively hydrolytic enzymes and carbohydrate-related metabolic processes thereby leading to an  
671 aberrant ER accumulation of vacuolar proteins, cell wall, and GPI-anchored proteins. The UPR is a  
672 powerful stress response that controls the expression of a large variety of UPR target genes (Travers  
673 *et al*, 2000). We observe a robust correlation between the UPR-dependent transcriptional upregulation  
674 of UPR target genes as determined by Travers *et al*. and the protein level in the stressed ER (Figure  
675 5D, E). The dramatic, selective accumulation of GPI-anchored proteins in the TM-stressed ER (Figure  
676 5F), however, suggests that different types of proteotoxic stresses can have different proteomic  
677 fingerprints at the organelle level. Our data suggest that TM impedes ER exit of GPI-APs by interfering  
678 with GPI anchor remodeling (Fujita *et al*, 2011; Rodriguez-Gallardo *et al*, 2020) consistent with previous  
679 observations that defects in the maturation of GPI-Aps trigger the UPR via a membrane based  
680 mechanism (Jonikas *et al*, 2009; Promlek *et al*, 2011).

681 . To further investigate the differences of DTT- and TM-induced changes of ER proteomes, we  
682 performed K-means clustering of the proteomic data (Supplementary Figure S5B). The analysis of GO  
683 term enrichments for the individual clusters revealed a small group of proteins that were accumulated  
684 in the DTT-stressed ER but depleted in the ER from TM-stressed cells (Supplementary Figure S5B, C,  
685 cluster 2). These proteins are involved in copper and iron transport (Fre7, Ctr1, and Fre1), which is  
686 interesting because iron affects the clustering propensity of Ire1 and the amplitude of UPR signaling  
687 (Cohen *et al*, 2017). Proteins in cluster 1 and 6 show more pronounced accumulation for TM-induced



688 stress. The GO terms enriched in these clusters are connected to the cell wall and cell wall-related  
689 carbohydrate metabolism, while cluster 6 shows particularly strong enrichments of the GO terms  
690 vacuolar lumen and peptidase activity for the TM-stressed ER.

691 Taken together, our proteomics data suggests that DTT- and TM-triggered ER stress leads to  
692 globally similar, yet qualitatively distinct forms of ER stress. Both forms of ER stress cause an  
693 accumulation of non-ER proteins in the ER, whose contribution to UPR activation remains to be  
694 systematically investigated.

### 695 ***Demonstrating the broad applicability of MemPrep on vacuolar membranes***

696 While MemPrep was optimized for the ER, we sought to make it widely applicable to any  
697 organelle. To this end, the general feasibility of MemPrep was demonstrated by isolating vacuolar  
698 membranes. Given that the vacuole receives membrane material from various sources via the secretory  
699 pathway, endocytosis, macroautophagy, lipophagy, and direct lipid transfer, it was unclear what the  
700 lipid composition of the vacuole would be and which organelle it would resemble even though its lipid  
701 composition has been partially addressed previously (Schneider *et al*, 1999; González Montoro *et al*,  
702 2018). From our genome-wide bait library, we decided to use a strain that expresses a bait-tagged  
703 variant of Vph1, the abundant, ATP-driven proton pump in the vacuole that exposes its C-terminal end  
704 to the cytosol. With the only exception that we used more starting material than for the ER, we applied  
705 the same protocol for the subcellular fractionation (Supplementary Figure S6A) and immuno-isolation  
706 (Figure 6A). Immuno-blotting of the final isolate revealed the presence of two vacuolar membrane  
707 proteins (the Vph1-bait and the palmitoylated Vac8), while other organellar markers for the ER and light  
708 microsomes (Dpm1, Kar2, 40kDa), mitochondria (Por1), endosomes (Ypt7, Pep12), the plasma  
709 membrane (Pdr5, Gas1), and peroxisomes (Pcs60 and Pex14) remained undetectable (Figure 6A). This  
710 demonstrates the global utility of MemPrep to isolate organelles.

711 We then performed shotgun lipidomics on the isolated vacuolar membranes and found that the  
712 lipid composition is substantially different from the whole cell lysate with respect to neutral storage lipids,  
713 glycerophospholipids, and sphingolipids (Figure 6B, C, Supplementary Table S3). It is also remarkably  
714 distinct from the plasma membrane (Surma *et al*, 2011), while it features similar characteristics with the  
715 ER with respect to the abundance of PC, PI, and complex sphingolipids (Supplementary Figure S6B).  
716 Nevertheless, the vacuolar membrane is clearly distinct from ER by featuring significantly higher levels  
717 of ergosterol and DAGs. Most striking is the absence of PA lipids in the vacuolar membrane  
718 (Supplementary Figure S6B). Consistent with the vacuolar functions as lipid degrading organelle, we  
719 find higher levels of the lyso-lipids LPC, LPE, and LPI in the vacuolar membrane compared to the ER  
720 membrane (Supplementary Figure S6C). Furthermore, the lipid fatty acyl chains are more saturated in  
721 the vacuole compared to the ER membrane (Supplementary Figure S6D). These findings demonstrate  
722 the remarkably versatility of our immuno-isolation procedure and its feasibility for organellar lipidomics.

723



## 724 Discussion

725 Understanding the homeostasis and adaptation of organellar membranes to metabolic  
726 perturbation and cellular stress is one of the key challenges in membrane biology. We developed  
727 MemPrep for the isolation of organellar membranes and a comprehensive and quantitative  
728 characterization of their composition. The versatility of this approach is demonstrated by the immuno-  
729 isolation of membrane vesicles from two very different organelles in yeast: the ER and the vacuole.  
730 Using state-of-the art lipidomics we provide a quantitative, molecular description of their membrane  
731 composition and establish a baseline for dissecting the role of lipids in transmembrane protein folding,  
732 trafficking, and function. Atomistic MD simulations highlight the difference between ER-mimetic  
733 membranes and PC-based lipid bilayers with respect to membrane thickness, lipid packing, the free  
734 volume profile, and surface charge distribution (Supplementary Figure S4D-G). The biochemical  
735 reconstitution of ER proteins in more realistic membrane environments is now feasible (Supplementary  
736 Table S2) and will become particularly relevant for the characterization of physicochemical membrane  
737 property sensors and the machineries that insert and extract membrane proteins into and out of the ER,  
738 respectively (Covino *et al*, 2018; Wu & Rapoport, 2021).

739 MemPrep overcomes the challenges associated with extensive membrane contact sites for the  
740 isolation of highly enriched organellar membranes. In contrast to recent strategies optimized for a rapid  
741 precipitation of organelles from yeast and mammalian cells (Liao *et al*, 2018; Melero *et al*, 2018; Ray *et al*,  
742 2020; Higuchi-Sanabria *et al*, 2020), MemPrep maximizes for purity and provides access to the eluted  
743 membranes vesicles for a direct spectroscopic characterization and straightforward coupling to  
744 quantitative, analytical platforms. MemPrep provides a median enrichment of 25.7 for over 178 tested  
745 ER-resident proteins. This is remarkable, because even enrichments of 6 to 7 over the cell lysate have  
746 been considered as sufficient or even optimal in the past (Zinser & Daum, 1995).

747 Quantitative lipidomics show that ER lipids have a remarkably high content of unsaturated fatty  
748 acyl chains (75 mol%). The resulting low degree of lipid saturation is a crucial determinant of ER identity  
749 (Bigay & Antonny, 2012; Holthuis & Menon, 2014). It is continuously monitored by lipid saturation  
750 sensors (Covino *et al*, 2016; Ballweg *et al*, 2020), and actively maintained by the OLE pathway that  
751 controls the production of unsaturated fatty acids (Hoppe *et al*, 2000). The high fraction of unsaturated  
752 lipids in the ER may be crucial for the integration of transmembrane proteins in the ER membrane.  
753 Because transmembrane proteins differ substantially in their shape and hydrophobic thickness  
754 depending on their final subcellular destination and function (Sharpe *et al*, 2010; Quiroga *et al*, 2013;  
755 Lorent *et al*, 2017, 2020), a particularly soft and deformable membrane environment can provide a  
756 suitable environment for their folding and assembly in macromolecular complexes (Radanović & Ernst,  
757 2021) and may also reduce the barrier for membrane protein integration via molecular invertases (Wu  
758 & Rapoport, 2021). In fact, the machineries that insert and remove membrane proteins into and from  
759 the ER, respectively, induce a local thinning of the membrane, presumably to lower the energy barrier  
760 for insertion and extraction (Wu & Rapoport, 2021). This membrane distortion should also render them  
761 sensitive to the lipid composition. In fact, increased membrane stiffness from increased lipid saturation  
762 or aberrantly high sterol levels inhibits the insertion of transmembrane proteins in model membranes  
763 (Brambillasca *et al*, 2005), the mammalian ER (Nilsson *et al*, 2001), and bacterial membranes (Kamel

764 *et al*, 2022). Therefore, it comes as no surprise that the stiffness and thickness of the ER membrane is  
765 continuously monitored by the UPR for regulating the relative rate of protein and lipid biosynthesis as  
766 well as the ERAD machinery (Travers *et al*, 2000; Schuck *et al*, 2009; Halbleib *et al*, 2017).

767 The high level of DAG and unsaturated lipids may be further important for forming connections  
768 with other organelles via stalk-like structures and support lipid exchange. Indeed, recent simulations  
769 showed that polyunsaturated lipids and, to an even higher degree, DAG may stabilize membrane stalks  
770 by tens of kilojoule per mole (Poojari *et al*, 2021).

771 The ergosterol level in the ER is 9.7 mol%, which is consistent with previous estimations (Zinser  
772 & Daum, 1995; Schneiter *et al*, 1999; Van Meer *et al*, 2008). However, it is also higher than the level of  
773 cholesterol in the ER of mammalian cells, which is tightly maintained at ~5 mol% (Radhakrishnan *et al*,  
774 2008). This discrepancy becomes less surprising when considering the different impact of ergosterol  
775 and cholesterol on collective, physicochemical membrane properties (Atkovska *et al*, 2018). Despite  
776 their overall structural similarity, 10 mol% cholesterol increases the order and bending rigidity of a POPC  
777 bilayer at 25°C roughly 2-fold more than 10 mol% ergosterol (Henriksen *et al*, 2004).

778 Our ER lipid data are fully consistent with a gradual increase of lipid saturation along the  
779 secretory pathway (Brügger *et al*, 2000; Van Meer *et al*, 2008) and complement previous work on the  
780 composition of the trans-Golgi network / endosomal (TGN/E) system, secretory vesicles, and the plasma  
781 membrane in yeast (Klemm *et al*, 2009; Surma *et al*, 2011). However, they are not consistent with a  
782 functionally relevant increase of ergosterol along the early secretory pathway, because the level in the  
783 ER (9.7 mol%) is barely distinct from that of the TGN/E system (9.8 mol%) (Klemm *et al*, 2009). Hence,  
784 our findings support that sterols are sorted and enriched predominantly at the level of the TGN (Klemm  
785 *et al*, 2009). The lack of a robust sterol gradient in the early secretory pathway has important implications  
786 for the sorting of transmembrane proteins (Sharpe *et al*, 2010; Herzig *et al*, 2012; Quiroga *et al*, 2013;  
787 Lorent *et al*, 2017) and is consistent with recent observations that favor diffusion barriers established by  
788 a local enrichment of sterols as the basis of protein sorting (Weigel *et al*, 2021). This would be  
789 reminiscent of the ceramide-based diffusion barriers for membrane proteins in the ER between mother  
790 and daughter cells (Clay *et al*, 2014; Megyeri *et al*, 2019). Related to this, the presence of complex  
791 sphingolipids in the ER may seem surprising at first as the biosynthesis of complex sphingolipids occurs  
792 in the Golgi complex (Van Meer *et al*, 2008). Our direct, quantitative data provide evidence that complex  
793 sphingolipids can reach the ER at substantial rate, where they can be degraded by the sphingolipid-  
794 selective phospholipase C Isc1 for producing ceramides as part of a salvage pathway for sphingolipids  
795 (Matmati & Hannun, 2008).

796 The lipid composition of the vacuole is vastly distinct from that of the plasma membrane (Surma  
797 *et al*, 2011) despite a substantial intake of membrane material via the endocytic route (Wendland *et al*,  
798 1998). However, the vacuolar membrane is also distinct from that of the ER with both lipid saturation  
799 (71 mol% unsaturated lipid acyl chains) and the sterol content (11.7 mol%) being higher in the vacuole.  
800 It is possible that a tighter packing of lipids in the vacuolar membrane is required to lower membrane  
801 permeability thereby contributing to the vacuolar acidification, which is crucial for activity of the luminal  
802 hydrolytic enzymes.

803

804 The most prominent lipid feature of the vacuole, which distinguishes it from the ER and other  
805 organellar membranes, is the absence of PA lipids. This is intriguing, because PA lipids are important  
806 signaling lipids that regulate lipid biosynthesis by sensing the cytosolic pH, which in turn is crucially  
807 regulated by the vacuolar proton pump (Young *et al*, 2010; Hofbauer *et al*, 2018). The higher level of  
808 lysolipids observed in vacuolar versus ER membranes is consistent with the role of the vacuole as a  
809 lipid-degrading organelle (Henry *et al*, 2012). Notably, due to the large head-to-tail volume ratio,  
810 lysolipids exhibit large positive intrinsic curvature that would favor the formation of membrane defects  
811 (Ting *et al*, 2018). Hence, the high levels of the negatively curved DAG may be required to counter-  
812 balance undesired effects from lysolipids on membrane stability.

813 We have established and employed MemPrep to identify molecular fingerprints of lipid bilayer  
814 stress. While lipid metabolic changes of the ER membrane have been firmly associated with chronic ER  
815 stress (Hotamisligil, 2010), the underlying molecular changes remained largely unexplored. We show  
816 that distinct conditions of lipid bilayer stress, namely inositol-depletion and prolonged proteotoxic  
817 stresses, are associated with dramatic changes of the ER lipid composition (Figure 3, 4). A PCA analysis  
818 reveals that the lipid fingerprints of inositol-depletion of prolonged proteotoxic stresses are remarkably  
819 distinct (Supplementary Figure S4B). We even observe opposing changes in the fatty acyl chain region:  
820 inositol-depletion is associated with a shortening of the lipid acyl chains, while prolonged proteotoxic  
821 stress correlates with acyl chain lengthening (Figure 3E, 4E, 4F). Furthermore, our quantitative data  
822 address an important, open question on the role of the PC-to-PE ratio as driver of the UPR. The ratio of  
823 PC-to-PE lipids is one of the key determinants of the lateral pressure profile and the curvature stress in  
824 cellular membranes, thereby affecting the conformational dynamics of membrane proteins (Marsh,  
825 1996; van den Brink-van der Laan *et al*, 2004; Phillips *et al*, 2009). An aberrantly increased PC-to-PE  
826 ratio in the ER was suggested to cause chronic ER stress in obese mice (Fu *et al*, 2011), but the general  
827 validity of this interpretation is controversially discussed (Gao *et al*, 2015). We employed MemPrep,  
828 quantitative lipidomics, and sensitive UPR assays to investigate this point in yeast. Prolonged  
829 proteotoxic stress is associated with a dramatically increased PC-to-PE ratio in the ER, which goes well  
830 beyond the range of physiological variation observed at different growth stages (Janssen *et al*, 2000;  
831 Klose *et al*, 2012; Casanovas *et al*, 2015; Tran *et al*, 2019). In contrast, artificially increasing the PC-to-  
832 PE ratio by supplementing choline to the medium is not sufficient to trigger the UPR (Supplementary  
833 Figure S3F). Inositol-depletion, on the other hand, activates the UPR without significantly perturbing the  
834 PC-to-PE ratio (Supplementary Figure S3F). Hence, we show that an aberrantly increased PC-to-PE  
835 ratio is not sufficient to mount a robust UPR in yeast. We favor the idea than a decreased PC-to-PE  
836 ratio and the accumulation of lipotoxic intermediates trigger the UPR in yeast by activating Ire1 either  
837 directly or indirectly (Ho *et al*, 2020; Ishiwata-Kimata *et al*, 2022). Hence, our quantitative analysis of the  
838 ER membrane composition of stressed and metabolically challenged cells provide important insights to  
839 tackle mechanistic questions related to the chronic activation of the UPR.

840 Common to all tested conditions of lipid bilayer stress is an increase of saturated lipids in the  
841 ER membrane (Figure 3D, 4D) and a decrease in anionic lipids (Supplementary Figure S4A). While  
842 changes in lipid saturation have been firmly implicated in the activation of the UPR in both yeast and  
843 mammalian cells (Pineau *et al*, 2009; Volmer *et al*, 2013; Halbleib *et al*, 2017; Piccolis *et al*, 2019), a  
844 general role of anionic lipids as attenuators of the UPR has never been explored. We consider it highly

845 unlikely that mildly increased levels of saturated lipids in the ER alone are sufficient to mount a full-  
846 blown UPR during inositol-depletion and prolonged proteotoxic stresses. We suggest that anionic lipids  
847 such as PI, PA, PS, and complex sphingolipids act as attenuators of the UPR, such that lipid saturation  
848 and the negative surface charge density of the ER jointly control output of the UPR. Notably, the level  
849 of PI and other inositol-containing lipids changes substantially in different growth stages (Casanovas *et al*,  
850 2015) and the availability of inositol is limiting for optimal growth of the commonly used strain BY4741  
851 (Hanscho *et al*, 2012). Integrating information on the membrane composition and properties, either  
852 directly or indirectly, is crucial for Ire1 to orchestrate membrane biogenesis by balancing the production  
853 of proteins and lipids (Covino *et al*, 2018).

854 Our proteomic analysis demonstrates the accumulation of a variety of proteins in the stressed  
855 ER, which are explained by a transcriptional upregulation via the UPR and aberrant trafficking along the  
856 secretory pathway (Figure 5). Most striking is the accumulation of GPI-anchored proteins under  
857 conditions of prolonged proteotoxic stresses. As aberrant handling of GPI-anchored proteins can trigger  
858 the UPR by a membrane-based mechanism (Jonikas *et al*, 2009; Promlek *et al*, 2011), we hypothesize  
859 that a failure to remodel of GPI-APs in the stressed ER (Rodriguez-Gallardo *et al*, 2020) triggers a build-  
860 up of these abundant cargoes, thereby perturbing the physicochemical properties of ER membrane and  
861 triggering the UPR (Halbleib *et al*, 2017). The mechanistic basis of this model will have to be addressed  
862 in the future. Based on our quantitative lipidomic and proteomic data, we propose that increased lipid  
863 saturation, depletion of anionic lipids, and changes of the membrane proteome all activate the UPR  
864 synergistically.

865 Combining MemPrep with quantitative proteomics unlocks a toolbox to study membrane protein  
866 targeting, sorting, and turnover at a global scale but with organellar resolution. Fascinating examples of  
867 inter-organelle communication highlight the crosstalk of the ER with lipid droplets, mitochondria,  
868 peroxisomes, and the vacuole in dealing with ER stress and lipotoxicity (Listenberger *et al*, 2003;  
869 Piccolis *et al*, 2019; Liao *et al*, 2021; Garcia *et al*, 2021). A rapid exchange of lipids between organelles  
870 provides a means to adapt to cellular stress and metabolic cues (Scorrano *et al*, 2019; Labbé *et al*,  
871 2021). Recently developed approaches provide a first glimpse at the rate of lipid exchange between  
872 individual certain organelles (John Peter *et al*, 2022), but there is a great need for new preparative and  
873 analytical tools to keep track of all lipids at all times. The combination of biosensors providing high spatial  
874 and temporal resolution with MemPrep, which provides quantitative and comprehensive snapshots of a  
875 given organelle at a certain time, surfaces as a promising approach to study membrane adaptively in  
876 a holistic fashion. We make MemPrep accessible to the community and have generated a collection of  
877 strains that facilitates the isolation of any organellar membrane of interest as demonstrated for the  
878 vacuolar membrane.

879

## 880 References

- 881 Abu-Remaileh M, Wyant GA, Kim C, Laqtom NN, Abbasi M, Chan SH, Freinkman E &  
882 Sabatini DM (2017) Lysosomal metabolomics reveals V-ATPase- and mTOR-dependent  
883 regulation of amino acid efflux from lysosomes. *Science* **358**: 807–813
- 884 Aguilera-Romero A, Kaminska J, Spang A, Riezman H & Muñoz M (2008) The yeast p24  
885 complex is required for the formation of COPI retrograde transport vesicles from the  
886 Golgi apparatus. *J. Cell Biol.* **180**: 713–720
- 887 Atkovska K, Klingler J, Oberwinkler J, Keller S & Hub JS (2018) Rationalizing Steroid  
888 Interactions with Lipid Membranes: Conformations, Partitioning, and Kinetics. *ACS*  
889 *Cent. Sci.* **4**: 1155–1165
- 890 Ballweg S, Sezgin E, Doktorova M, Covino R, Reinhard J, Wunnicke D, Hänel I, Levental I,  
891 Hummer G & Ernst R (2020) Regulation of lipid saturation without sensing membrane  
892 fluidity. *Nat. Commun.* **11**: 756
- 893 Becuwe M, Bond LM, Pinto AFM, Boland S, Mejhert N, Elliott SD, Cicconet M, Graham MM,  
894 Liu XN, Ilkayeva O, Saghatelian A, Walther TC & Farese R V. (2020) FIT2 is an acyl-  
895 coenzyme A diphosphatase crucial for endoplasmic reticulum homeostasis. *J. Cell Biol.*  
896 **219**: e202006111
- 897 Berendsen HJC, Postma JPM, Van Gunsteren WF, Dinola A & Haak JR (1984) Molecular  
898 dynamics with coupling to an external bath. *J. Chem. Phys.* **81**: 3684–3690
- 899 Best RB, Zhu X, Shim J, Lopes PEM, Mittal J, Feig M & Mackerell AD (2012) Optimization of  
900 the additive CHARMM all-atom protein force field targeting improved sampling of the  
901 backbone  $\phi$ ,  $\psi$  and side-chain  $\chi(1)$  and  $\chi(2)$  dihedral angles. *J. Chem. Theory Comput.*  
902 **8**: 3257–3273
- 903 Bigay J & Antonny B (2012) Curvature, Lipid Packing, and Electrostatics of Membrane  
904 Organelles: Defining Cellular Territories in Determining Specificity. *Dev. Cell* **23**: 886–  
905 895
- 906 Brambillasca S, Yabal M, Soffientini P, Stefanovic S, Makarow M, Hegde RS & Borgese N  
907 (2005) Transmembrane topogenesis of a tail-anchored protein is modulated by  
908 membrane lipid composition. *EMBO J.* **24**: 2533–2542
- 909 van den Brink-van der Laan E, Antoinette Killian J & de Kruijff B (2004) Nonbilayer lipids  
910 affect peripheral and integral membrane proteins via changes in the lateral pressure  
911 profile. *Biochim. Biophys. Acta - Biomembr.* **1666**: 275–288
- 912 Brügger B, Sandhoff R, Wegehingel S, Gorgas K, Malsam J, Helms JB, Lehmann WD,  
913 Nickel W & Wieland FT (2000) Evidence for segregation of sphingomyelin and  
914 cholesterol during formation of COPI-coated vesicles. *J. Cell Biol.* **151**: 507–517
- 915 Bussi G, Donadio D & Parrinello M (2007) Canonical sampling through velocity rescaling. *J.*  
916 *Chem. Phys.* **126**: 014101
- 917 Casanovas A, Sprenger RR, Tarasov K, Ruckerbauer DE, Hannibal-Bach HK, Zanghellini J,  
918 Jensen ON & Ejsing CS (2015) Quantitative analysis of proteome and lipidome  
919 dynamics reveals functional regulation of global lipid metabolism. *Chem. Biol.* **22**: 412–  
920 425
- 921 Clay L, Caudron F, Denoth-Lippuner A, Boettcher B, Buvelot Frei S, Snapp EL & Barral Y



- 922 (2014) A sphingolipid-dependent diffusion barrier confines ER stress to the yeast  
923 mother cell. *Elife* **3**: e01883
- 924 Cohen N, Breker M, Bakunts A, Pesek K, Chas A, Argemí J, Orsi A, Gal L, Chuartzman S,  
925 Wigelman Y, Jonas F, Walter P, Ernst R, Aragón T, van Anken E & Schuldiner M (2017)  
926 Iron affects Ire1 clustering propensity and the amplitude of endoplasmic reticulum stress  
927 signaling. *J. Cell Sci.* **130**: 3222–3233
- 928 Covino R, Ballweg S, Stordeur C, Michaelis JB, Puth K, Wernig F, Bahrami A, Ernst AM,  
929 Hummer G & Ernst R (2016) A Eukaryotic Sensor for Membrane Lipid Saturation. *Mol.*  
930 *Cell* **63**: 49–59
- 931 Covino R, Hummer G & Ernst R (2018) Integrated Functions of Membrane Property Sensors  
932 and a Hidden Side of the Unfolded Protein Response. *Mol. Cell* **71**: 458–467
- 933 Cox JS, Chapman RE & Walter P (1997) The unfolded protein response coordinates the  
934 production of endoplasmic reticulum protein and endoplasmic reticulum membrane. *Mol.*  
935 *Biol. Cell* **8**: 1805–1814
- 936 Ejsing CS, Sampaio JL, Surendranath V, Duchoslav E, Ekroos K, Klemm RW, Simons K &  
937 Shevchenko A (2009) Global analysis of the yeast lipidome by quantitative shotgun  
938 mass spectrometry. *Proc. Natl. Acad. Sci. U. S. A.* **106**: 2136–2141
- 939 English AR & Voeltz GK (2013) Endoplasmic reticulum structure and interconnections with  
940 other organelles. *Cold Spring Harb. Perspect. Biol.* **5**: 1–16
- 941 Ernst R, Ballweg S & Levental I (2018) Cellular mechanisms of physicochemical membrane  
942 homeostasis. *Curr. Opin. Cell Biol.* **53**: 44–51
- 943 Ernst R, Ejsing CS & Antonny B (2016) Homeoviscous Adaptation and the Regulation of  
944 Membrane Lipids. *J. Mol. Biol.* **428**: 4776–4791
- 945 Essmann U, Perera L, Berkowitz ML, Darden T, Lee H & Pedersen LG (1995) A smooth  
946 particle mesh Ewald method. *J. Chem. Phys.* **103**: 8577–8593
- 947 Feng B, Yaol PM, Li Y, Devlin CM, Zhang D, Harding HP, Sweeney M, Rong JX, Kuriakose  
948 G, Fisher EA, Marks AR, Ron D & Tabas I (2003) The endoplasmic reticulum is the site  
949 of cholesterol-induced cytotoxicity in macrophages. *Nat. Cell Biol.* **5**: 781–792
- 950 Franken H, Mathieson T, Childs D, Sweetman GMA, Werner T, Tögel I, Doce C, Gade S,  
951 Bantscheff M, Drewes G, Reinhard FBM, Huber W & Savitski MM (2015) Thermal  
952 proteome profiling for unbiased identification of direct and indirect drug targets using  
953 multiplexed quantitative mass spectrometry. *Nat. Protoc.* **10**: 1567–1593
- 954 Fu S, Yang L, Li P, Hofmann O, Dicker L, Hide W, Lin X, Watkins SM, Ivanov AR &  
955 Hotamisligil GS (2011) Aberrant lipid metabolism disrupts calcium homeostasis causing  
956 liver endoplasmic reticulum stress in obesity. *Nature* **473**: 528–531
- 957 Fujita M, Watanabe R, Jaensch N, Romanova-Michaelides M, Satoh T, Kato M, Riezman H,  
958 Yamaguchi Y, Maeda Y & Kinoshita T (2011) Sorting of GPI-anchored proteins into ER  
959 exit sites by p24 proteins is dependent on remodeled GPI. *J. Cell Biol.* **194**: 61–75
- 960 Gao X, van der Veen JN, Vance JE, Thiesen A, Vance DE & Jacobs RL (2015) Lack of  
961 phosphatidylethanolamine N-methyltransferase alters hepatic phospholipid composition  
962 and induces endoplasmic reticulum stress. *Biochim. Biophys. Acta - Mol. Basis Dis.*  
963 **1852**: 2689–2699



- 964 Garcia EJ, Liao PC, Tan G, Vevea JD, Sing CN, Tsang CA, McCaffery JM, Boldogh IR &  
965 Pon LA (2021) Membrane dynamics and protein targets of lipid droplet microautophagy  
966 during ER stress-induced proteostasis in the budding yeast, *Saccharomyces cerevisiae*.  
967 *Autophagy* **17**: 2363–2383
- 968 Gautier R, Bacle A, Tiberti ML, Fuchs PF, Vanni S & Antonny B (2018) PackMem: A  
969 Versatile Tool to Compute and Visualize Interfacial Packing Defects in Lipid Bilayers.  
970 *Biophys. J.* **115**: 436–444
- 971 Ghaemmaghami S, Huh WK, Bower K, Howson RW, Belle A, Dephoure N, O’Shea EK &  
972 Weissman JS (2003) Global analysis of protein expression in yeast. *Nature* **425**: 737–  
973 741
- 974 González Montoro A, Auffarth K, Hönscher C, Bohnert M, Becker T, Warscheid B, Reggiori  
975 F, van der Laan M, Fröhlich F & Ungermann C (2018) Vps39 Interacts with Tom40 to  
976 Establish One of Two Functionally Distinct Vacuole-Mitochondria Contact Sites. *Dev.*  
977 *Cell* **45**: 621-636.e7
- 978 Halbleib K, Pesek K, Covino R, Hofbauer HF, Wunnicke D, Hänel I, Hummer G & Ernst R  
979 (2017) Activation of the Unfolded Protein Response by Lipid Bilayer Stress. *Mol. Cell*  
980 **67**: 673-684.e8
- 981 Han S, Lone MA, Schneiter R & Chang A (2010) Orm1 and Orm2 are conserved  
982 endoplasmic reticulum membrane proteins regulating lipid homeostasis and protein  
983 quality control. *Proc. Natl. Acad. Sci. U. S. A.* **107**: 5851–5856
- 984 Hanscho M, Ruckerbauer DE, Chauhan N, Hofbauer HF, Krahulec S, Nidetzky B, Kohlwein  
985 SD, Zanghellini J & Natter K (2012) Nutritional requirements of the BY series of  
986 *Saccharomyces cerevisiae* strains for optimum growth. *FEMS Yeast Res.* **12**: 796–808
- 987 Harayama T & Riezman H (2018) Understanding the diversity of membrane lipid  
988 composition. *Nat. Rev. Mol. Cell Biol.* **19**: 281–296
- 989 Henne WM, Reese ML & Goodman JM (2018) The assembly of lipid droplets and their roles  
990 in challenged cells. *EMBO J.* **37**: e98947
- 991 Henriksen J, Rowat AC & Ipsen JH (2004) Vesicle fluctuation analysis of the effects of  
992 sterols on membrane bending rigidity. *Eur. Biophys. J.* **33**: 732–741
- 993 Henry SA, Kohlwein SD & Carman GM (2012) Metabolism and regulation of glycerolipids in  
994 the yeast *Saccharomyces cerevisiae*. *Genetics* **190**: 317–49
- 995 Herzig Y, Sharpe HJ, Elbaz Y, Munro S & Schuldiner M (2012) A systematic approach to pair  
996 secretory cargo receptors with their cargo suggests a mechanism for cargo selection by  
997 Erv14. *PLoS Biol.* **10**: e1001329
- 998 Herzog R, Schuhmann K, Schwudke D, Sampaio JL, Bornstein SR, Schroeder M &  
999 Shevchenko A (2012) LipidXplorer: a software for consensual cross-platform lipidomics.  
1000 *PLoS One* **7**: e29851
- 1001 Herzog R, Schwudke D, Schuhmann K, Sampaio JL, Bornstein SR, Schroeder M &  
1002 Shevchenko A (2011) A novel informatics concept for high-throughput shotgun  
1003 lipidomics based on the molecular fragmentation query language. *Genome Biol.* **12**: R8
- 1004 Hess B (2008) P-LINCS: A Parallel Linear Constraint Solver for Molecular Simulation. *J.*  
1005 *Chem. Theory Comput.* **4**: 116–122

- 1006 Higuchi-Sanabria R, Shen K, Kelet N, Frankino PA, Durieux J, Bar-Ziv R, Sing CN, Garcia  
1007 EJ, Homentcovschi S, Sanchez M, Wu R, Tronnes SU, Joe L, Webster B, Ahilon-  
1008 Jeronimo A, Monshietehadi S, Dallarda S, Pender C, Pon LA, Zoncu R, et al (2020)  
1009 Lysosomal recycling of amino acids affects ER quality control. *Sci. Adv.* **6**: eaaz9805
- 1010 Ho N, Xu C & Thibault G (2018) From the unfolded protein response to metabolic diseases -  
1011 lipids under the spotlight. *J. Cell Sci.* **131**: jcs199307
- 1012 Ho N, Yap WS, Xu J, Wu H, Koh JH, Goh WW Bin, George B, Chong SC, Taubert S &  
1013 Thibault G (2020) Stress sensor Ire1 deploys a divergent transcriptional program in  
1014 response to lipid bilayer stress. *J. Cell Biol.* **219**: e201909165
- 1015 Hofbauer HF, Gecht M, Fischer SC, Seybert A, Frangakis AS, Stelzer EHK, Covino R,  
1016 Hummer G & Ernst R (2018) The molecular recognition of phosphatidic acid by an  
1017 amphipathic helix in Opi1. *J. Cell Biol.* **217**: 3109–3126
- 1018 Holthuis JCM & Menon AK (2014) Lipid landscapes and pipelines in membrane homeostasis.  
1019 *Nature* **510**: 48–57
- 1020 Hoppe T, Matuschewski K, Rape M, Schlenker S, Ulrich HD & Jentsch S (2000) Activation of  
1021 a membrane-bound transcription factor by regulated ubiquitin/proteasome-dependent  
1022 processing. *Cell* **102**: 577–86
- 1023 Hotamisligil GS (2010) Endoplasmic reticulum stress and the inflammatory basis of metabolic  
1024 disease. *Cell* **140**: 900–917
- 1025 Hou NS, Gutschmidt A, Choi DY, Pather K, Shi X, Watts JL, Hoppe T & Taubert S (2014)  
1026 Activation of the endoplasmic reticulum unfolded protein response by lipid disequilibrium  
1027 without disturbed proteostasis in vivo. *Proc. Natl. Acad. Sci.* **111**: E2271–E2280
- 1028 Huang J, Rauscher S, Nawrocki G, Ran T, Feig M, de Groot BL, Grubmüller H & MacKerell  
1029 AD (2017) CHARMM36m: an improved force field for folded and intrinsically disordered  
1030 proteins. *Nat. Methods* **14**: 71–73
- 1031 Huber W, von Heydebreck A, Sultmann H, Poustka A & Vingron M (2002) Variance  
1032 stabilization applied to microarray data calibration and to the quantification of differential  
1033 expression. *Bioinformatics* **18**: S96–S104
- 1034 Hughes CS, Foehr S, Garfield DA, Furlong EE, Steinmetz LM & Krijgsveld J (2014)  
1035 Ultrasensitive proteome analysis using paramagnetic bead technology. *Mol. Syst. Biol.*  
1036 **10**: 757
- 1037 Ishiwata-Kimata Y, Le QG & Kimata Y (2022) Induction and Aggravation of the Endoplasmic-  
1038 Reticulum Stress by Membrane-Lipid Metabolic Intermediate Phosphatidyl-N-  
1039 Monomethylethanolamine. *Front. Cell Dev. Biol.* **9**: 743018
- 1040 Janssen MJ, Koorengel MC, de Kruijff B & de Kroon AI (2000) The phosphatidylcholine to  
1041 phosphatidylethanolamine ratio of *Saccharomyces cerevisiae* varies with the growth  
1042 phase. *Yeast* **16**: 641–650
- 1043 Jiménez-Rojo N, Feng S, Morstein J, Pritzl SD, Harayama T, Asaro A, Vepřek NA, Arp CJ,  
1044 Reynders M, Novak AJE, Kanshin E, Ueberheide B, Lohmüller T, Riezman H & Trauner  
1045 D (2022) Optical Control of Membrane Fluidity Modulates Protein Secretion. *bioRxiv*:  
1046 2022.02.14.480333
- 1047 Jo S, Lim JB, Klauda JB & Im W (2009) CHARMM-GUI Membrane Builder for mixed bilayers  
1048 and its application to yeast membranes. *Biophys. J.* **97**: 50–58

- 1049 John Peter AT, Petrunaro C, Peter M & Kornmann B (2022) METALIC reveals  
1050 interorganelle lipid flux in live cells by enzymatic mass tagging. *Nat. Cell Biol.* **24**: 996–  
1051 1004
- 1052 Jonikas MC, Collins SR, Denic V, Oh E, Quan EM, Schmid V, Weibezahn J, Schwappach B,  
1053 Walter P, Weissman JS & Schuldiner M (2009) Comprehensive Characterization of  
1054 Genes Required for Protein Folding in the Endoplasmic Reticulum. *Science* **323**: 1693–  
1055 1697
- 1056 Jorgensen WL, Chandrasekhar J, Madura JD, Impey RW & Klein ML (1998) Comparison of  
1057 simple potential functions for simulating liquid water. *J. Chem. Phys.* **79**: 926
- 1058 Kaiser H-J, Surma MA, Mayer F, Levental I, Grzybek M, Klemm RW, Da Cruz S, Meisinger  
1059 C, Müller V, Simons K & Lingwood D (2011) Molecular convergence of bacterial and  
1060 eukaryotic surface order. *J. Biol. Chem.* **286**: 40631–7
- 1061 Kamel M, Löwe M, Schott-Verdugo S, Gohlke H & Kedrov A (2022) Unsaturated fatty acids  
1062 augment protein transport via the SecA:SecYEG translocon. *FEBS J.* **289**: 140–162
- 1063 Kennedy EP & Weiss SB (1956) THE FUNCTION OF CYTIDINE COENZYMES IN THE  
1064 BIOSYNTHESIS OF PHOSPHOLIPIDES. *J. Biol. Chem.* **222**: 193–214
- 1065 Klemm RW, Ejsing CS, Surma MA, Kaiser HJ, Gerl MJ, Sampaio JL, De Robillard Q,  
1066 Ferguson C, Proszynski TJ, Shevchenko A & Simons K (2009) Segregation of  
1067 sphingolipids and sterols during formation of secretory vesicles at the trans-Golgi  
1068 network. *J. Cell Biol.* **185**: 601–612
- 1069 Klose C, Surma MA, Gerl MJ, Meyenhofer F, Shevchenko A & Simons K (2012) Flexibility of  
1070 a eukaryotic lipidome--insights from yeast lipidomics. *PLoS One* **7**: e35063
- 1071 Kurat CF, Natter K, Petschnigg J, Wolinski H, Scheuringer K, Scholz H, Zimmermann R,  
1072 Leber R, Zechner R & Kohlwein SD (2006) Obese yeast: Triglyceride lipolysis is  
1073 functionally conserved from mammals to yeast. *J. Biol. Chem.* **281**: 491–500
- 1074 Labbé K, Mookerjee S, Le Vasseur M, Gibbs E, Lerner C & Nunnari J (2021) The modified  
1075 mitochondrial outer membrane carrier MTCH2 links mitochondrial fusion to lipogenesis.  
1076 *J. Cell Biol.* **220**: e202103122
- 1077 Lajoie P, Moir RD, Willis IM & Snapp EL (2012) Kar2p availability defines distinct forms of  
1078 endoplasmic reticulum stress in living cells. *Mol. Biol. Cell* **23**: 955–964
- 1079 Lauber C, Gerl MJ, Klose C, Ottosson F, Melander O & Simons K (2022) Lipidomic risk  
1080 scores are independent of polygenic risk scores and can predict incidence of diabetes  
1081 and cardiovascular disease in a large population cohort. *PLOS Biol.* **20**: e3001561
- 1082 Levental KR, Malmberg E, Symons JL, Fan Y-Y, Chapkin RS, Ernst R & Levental I (2020)  
1083 Lipidomic and biophysical homeostasis of mammalian membranes counteracts dietary  
1084 lipid perturbations to maintain cellular fitness. *Nat. Commun.* **11**: 1339
- 1085 Liao P-C, Boldogh IR, Siegmund SE, Freyberg Z & Pon LA (2018) Isolation of mitochondria  
1086 from *Saccharomyces cerevisiae* using magnetic bead affinity purification. *PLoS One* **13**:  
1087 e0196632
- 1088 Liao PC, Garcia EJ, Tan G, Tsang CA & Pon LA (2021) Roles for L o microdomains and  
1089 ESCRT in ER stress-induced lipid droplet microautophagy in budding yeast. *Mol. Biol.*  
1090 *Cell* **32**: br12

- 1091 Liebisch G, Binder M, Schifferer R, Langmann T, Schulz B & Schmitz G (2006) High  
1092 throughput quantification of cholesterol and cholesteryl ester by electrospray ionization  
1093 tandem mass spectrometry (ESI-MS/MS). *1761*: 121–128
- 1094 Listenberger LL, Han X, Lewis SE, Cases S, Farese R V, Ory DS & Schaffer JE (2003)  
1095 Triglyceride accumulation protects against fatty acid-induced lipotoxicity. *Proc. Natl.*  
1096 *Acad. Sci.* **100**: 3077–3082
- 1097 Lorent JH, Diaz-Rohrer B, Lin X, Spring K, Gorfe AA, Levental KR & Levental I (2017)  
1098 Structural determinants and functional consequences of protein affinity for membrane  
1099 rafts. *Nat. Commun.* **8**: 1219
- 1100 Lorent JH, Levental KR, Ganesan L, Rivera-Longworth G, Sezgin E, Doktorova M, Lyman E  
1101 & Levental I (2020) Plasma membranes are asymmetric in lipid unsaturation, packing  
1102 and protein shape. *Nat. Chem. Biol.* **16**: 644–652
- 1103 Marsh D (1996) Lateral pressure in membranes. *Biochim. Biophys. Acta* **1286**: 183–223
- 1104 Matmati N & Hannun YA (2008) ISC1 (inositol phosphosphingolipid-phospholipase C), the  
1105 yeast homologue of neutral sphingomyelinases. In *Journal of Lipid Research* pp 922–  
1106 928. *J Lipid Res*
- 1107 Van Meer G, Voelker DR & Feigenson GW (2008) Membrane lipids: Where they are and how  
1108 they behave. *Nat. Rev. Mol. Cell Biol.* **9**: 112–124
- 1109 Megyeri M, Prasad R, Volpert G, Sliwa-Gonzalez A, Haribowo AG, Aguilera-Romero A,  
1110 Riezman H, Barral Y, Futerman AH & Schuldiner M (2019) Yeast ceramide synthases,  
1111 Lag1 and Lac1, have distinct substrate specificity. *J. Cell Sci.* **132**: jcs228411
- 1112 Melero A, Chiaruttini N, Karashima T, Riezman I, Funato K, Barlowe C, Riezman H & Roux A  
1113 (2018) Lysophospholipids Facilitate COPII Vesicle Formation. *Curr. Biol.* **28**: 1950-  
1114 1958.e6
- 1115 Meurer M, Duan Y, Sass E, Kats I, Herbst K, Buchmuller BC, Dederer V, Huber F, Kirrmaier  
1116 D, Štefl M, Van Laer K, Dick TP, Lemberg MK, Khmelinskii A, Levy ED & Knop M (2018)  
1117 Genome-wide C-SWAT library for high-throughput yeast genome tagging. *Nat. Methods*  
1118 **15**: 598–600
- 1119 Moggridge S, Sorensen PH, Morin GB & Hughes CS (2018) Extending the Compatibility of  
1120 the SP3 Paramagnetic Bead Processing Approach for Proteomics. *J. Proteome Res.*  
1121 **17**: 1730–1740
- 1122 Namba T (2019) BAP31 regulates mitochondrial function via interaction with Tom40 within  
1123 ER-mitochondria contact sites. *Sci. Adv.* **5**: eaaw1386
- 1124 Nilsson IM, Ohvo-Rekilä H, Slotte JP, Johnson AE & Von Heijne G (2001) Inhibition of  
1125 Protein Translocation across the Endoplasmic Reticulum Membrane by Sterols. *J. Biol.*  
1126 *Chem.* **276**: 41748–41754
- 1127 Páll S, Zhmurov A, Bauer P, Abraham M, Lundborg M, Gray A, Hess B & Lindahl E (2020)  
1128 Heterogeneous parallelization and acceleration of molecular dynamics simulations in  
1129 GROMACS. *J. Chem. Phys.* **153**: 134110
- 1130 Parrinello M & Rahman A (1981) Polymorphic transitions in single crystals: A new molecular  
1131 dynamics method. *J. Appl. Phys.* **52**: 7182–7190
- 1132 Pérez-Martí A, Ramakrishnan S, Li J, Dugourd A, Molenaar MR, De La Motte LR, Grand K,



- 1133 Mansouri A, Parisot M, Lienkamp SS, Saez-Rodriguez J & Simons M (2022) Reducing  
1134 lipid bilayer stress by monounsaturated fatty acids protects renal proximal tubules in  
1135 diabetes. *Elife* **11**: e74391
- 1136 Phillips R, Ursell T, Wiggins P & Sens P (2009) Emerging roles for lipids in shaping  
1137 membrane-protein function. *Nature* **459**: 379–385
- 1138 Piccolis M, Bond LM, Kampmann M, Pulimeno P, Chitraju C, Jayson CBK, Vaites LP, Boland  
1139 S, Lai ZW, Gabriel KR, Elliott SD, Paulo JA, Harper JW, Weissman JS, Walther TC &  
1140 Farese R V. (2019) Probing the Global Cellular Responses to Lipotoxicity Caused by  
1141 Saturated Fatty Acids. *Mol. Cell* **74**: 32–44.e8
- 1142 Pineau L, Colas J, Dupont S, Beney L, Fleurat-Lessard P, Berjeaud JM, Bergès T & Ferreira  
1143 T (2009) Lipid-induced ER stress: Synergistic effects of sterols and saturated fatty  
1144 acids. *Traffic* **10**: 673–690
- 1145 Poojari CS, Scherer KC & Hub JS (2021) Free energies of membrane stalk formation from a  
1146 lipidomics perspective. *Nat. Commun.* **12**: 6594
- 1147 Promlek T, Ishiwata-Kimata Y, Shido M, Sakuramoto M, Kohno K & Kimata Y (2011)  
1148 Membrane aberrancy and unfolded proteins activate the endoplasmic reticulum stress  
1149 sensor Ire1 in different ways. *Mol. Biol. Cell* **22**: 3520–3532
- 1150 Puri P, Baillie RA, Wiest MM, Mirshahi F, Choudhury J, Cheung O, Sargeant C, Contos MJ &  
1151 Sanyal AJ (2007) A lipidomic analysis of nonalcoholic fatty liver disease. *Hepatology* **46**:  
1152 1081–1090
- 1153 Quiroga R, Trenchi A, Montoro AG, Taubas JV & Maccioni HJF (2013) Short transmembrane  
1154 domains with high-volume exoplasmic halves determine retention of type II membrane  
1155 proteins in the golgi complex. *J. Cell Sci.* **126**: 5344–5349
- 1156 Radanović T & Ernst R (2021) The Unfolded Protein Response as a Guardian of the  
1157 Secretory Pathway. *Cells* **10**: 2965
- 1158 Radhakrishnan A, Goldstein JL, McDonald JG & Brown MS (2008) Switch-like Control of  
1159 SREBP-2 Transport Triggered by Small Changes in ER Cholesterol: A Delicate  
1160 Balance. *Cell Metab.* **8**: 512–521
- 1161 Ralph-Epps T, Onu CJ, Vo L, Schmidtke MW, Le A & Greenberg ML (2021) Studying Lipid-  
1162 Related Pathophysiology Using the Yeast Model. *Front. Physiol.* **12**: 768411
- 1163 Ray GJ, Boydston EA, Shortt E, Wyant GA, Lourido S, Chen WW & Sabatini DM (2020) A  
1164 PEROXO-Tag Enables Rapid Isolation of Peroxisomes from Human Cells. *iScience* **23**:  
1165 101109
- 1166 Reglinski K, Steinfert-Effelsberg L, Sezgin E, Klose C, Platta HW, Girzalsky W, Eggeling C &  
1167 Erdmann R (2020) Fluidity and Lipid Composition of Membranes of Peroxisomes,  
1168 Mitochondria and the ER From Oleic Acid-Induced *Saccharomyces cerevisiae*. *Front.*  
1169 *Cell Dev. Biol.* **8**: 574363
- 1170 Reinhard J, Mattes C, Váth K, Radanović T, Surma MA, Klose C & Ernst R (2020) A  
1171 Quantitative Analysis of Cellular Lipid Compositions During Acute Proteotoxic ER Stress  
1172 Reveals Specificity in the Production of Asymmetric Lipids. *Front. Cell Dev. Biol.* **8**: 756
- 1173 Renne MF, Bao X, Hokken MW, Bierhuizen AS, Hermansson M, Sprenger RR, Ewing TA,  
1174 Ma X, Cox RC, Brouwers JF, De Smet CH, Ejsing CS & de Kroon AI (2022) Molecular  
1175 species selectivity of lipid transport creates a mitochondrial sink for di-unsaturated



- 1176 phospholipids. *EMBO J.* **41**: e106837
- 1177 Renne MF, Bao X, De Smet CH & de Kroon AIPM (2015) Lipid Acyl Chain Remodeling in  
1178 Yeast. *Lipid Insights* **8**: 33–40
- 1179 Ridsdale A, Denis M, Gougeon PY, Ngsee JK, Presley JF & Zha X (2006) Cholesterol is  
1180 required for efficient endoplasmic reticulum-to-Golgi transport of secretory membrane  
1181 proteins. *Mol. Biol. Cell* **17**: 1593–1605
- 1182 Rodriguez-Gallardo S, Kurokawa K, Sabido-Bozo S, Cortes-Gomez A, Ikeda A, Zoni V,  
1183 Aguilera-Romero A, Perez-Linero AM, Lopez S, Waga M, Araki M, Nakano M, Riezman  
1184 H, Funato K, Vanni S, Nakano A & Muñiz M (2020) Ceramide chain length-dependent  
1185 protein sorting into selective endoplasmic reticulum exit sites. *Sci. Adv.* **6**: aba8237
- 1186 Savitski MM, Wilhelm M, Hahne H, Kuster B & Bantscheff M (2015) A Scalable Approach for  
1187 Protein False Discovery Rate Estimation in Large Proteomic Data Sets. *Mol. Cell.*  
1188 *Proteomics* **14**: 2394–2404
- 1189 Schindelin J, Arganda-Carreras I, Frise E, Kaynig V, Longair M, Pietzsch T, Preibisch S,  
1190 Rueden C, Saalfeld S, Schmid B, Tinevez JY, White DJ, Hartenstein V, Eliceiri K,  
1191 Tomancak P & Cardona A (2012) Fiji: An open-source platform for biological-image  
1192 analysis. *Nat. Methods* **9**: 676–682
- 1193 Schneiter R, Brügger B, Sandhoff R, Zellnig G, Leber A, Lampl M, Athenstaedt K, Hrastnik C,  
1194 Eder S, Daum G, Paltauf F, Wieland FT & Kohlwein SD (1999) Electrospray ionization  
1195 tandem mass spectrometry (ESI-MS/MS) analysis of the lipid molecular species  
1196 composition of yeast subcellular membranes reveals acyl chain-based  
1197 sorting/remodeling of distinct molecular species en route to the plasma membrane. *J.*  
1198 *Cell Biol.* **146**: 741–754
- 1199 Schott-Verdugo S & Gohlke H (2019) PACKMOL-Memgen: A Simple-To-Use, Generalized  
1200 Workflow for Membrane-Protein-Lipid-Bilayer System Building. *J. Chem. Inf. Model.* **59**:  
1201 2522–2528
- 1202 Schuck S, Prinz WA, Thorn KS, Voss C & Walter P (2009) Membrane expansion alleviates  
1203 endoplasmic reticulum stress independently of the unfolded protein response. *J. Cell*  
1204 *Biol.* **187**: 525–536
- 1205 Scorrano L, De Matteis MA, Emr S, Giordano F, Hajnóczky G, Kornmann B, Lackner LL,  
1206 Levine TP, Pellegrini L, Reinisch K, Rizzuto R, Simmen T, Stenmark H, Ungermann C &  
1207 Schuldiner M (2019) Coming together to define membrane contact sites. *Nat. Commun.*  
1208 **10**: 1287
- 1209 Semenza JC, Hardwick KG, Dean N & Pelham HRB (1990) ERD2, a yeast gene required for  
1210 the receptor-mediated retrieval of luminal ER proteins from the secretory pathway. *Cell*  
1211 **61**: 1349–1357
- 1212 Sharpe HJ, Stevens TJ & Munro S (2010) A Comprehensive Comparison of Transmembrane  
1213 Domains Reveals Organelle-Specific Properties. *Cell* **142**: 158–169
- 1214 Sinensky M (1974) Homeoviscous adaptation--a homeostatic process that regulates the  
1215 viscosity of membrane lipids in *Escherichia coli*. *Proc. Natl. Acad. Sci. U. S. A.* **71**: 522–  
1216 5
- 1217 Surma MA, Gerl MJ, Herzog R, Helppi J, Simons K & Klöse C (2021) Mouse lipidomics  
1218 reveals inherent flexibility of a mammalian lipidome. *Sci. Rep.* **11**: 19364

- 1219 Surma MA, Herzog R, Vasilj A, Klose C, Christinat N, Morin-Rivron D, Simons K, Masoodi M  
1220 & Sampaio JL (2015) An automated shotgun lipidomics platform for high throughput,  
1221 comprehensive, and quantitative analysis of blood plasma intact lipids. **117**: 1540–1549
- 1222 Surma MA, Klose C, Klemm RW, Ejsing CS & Simons K (2011) Generic Sorting of Raft  
1223 Lipids into Secretory Vesicles in Yeast. *Traffic* **12**: 1139–1147
- 1224 Surma MA, Klose C, Peng D, Shales M, Mrejen C, Stefanko A, Braberg H, Gordon DE,  
1225 Vorkel D, Ejsing CS, Farese R, Simons K, Krogan NJ & Ernst R (2013) A Lipid E-MAP  
1226 Identifies Ubx2 as a Critical Regulator of Lipid Saturation and Lipid Bilayer Stress. *Mol.*  
1227 *Cell* **51**: 519–530
- 1228 Tabassum R, Rämö JT, Ripatti P, Koskela JT, Kurki M, Karjalainen J, Palta P, Hassan S,  
1229 Nunez-Fontarnau J, Kiiskinen TTJ, Söderlund S, Matikainen N, Gerl MJ, Surma MA,  
1230 Klose C, Stitzel NO, Laivuori H, Havulinna AS, Service SK, Salomaa V, et al (2019)  
1231 Genetic architecture of human plasma lipidome and its link to cardiovascular disease.  
1232 *Nat. Commun.* **10**: 4329
- 1233 Takamori S, Holt M, Stenius K, Lemke EA, Grønborg M, Riedel D, Urlaub H, Schenck S,  
1234 Brügger B, Ringler P, Müller SA, Rammner B, Gräter F, Hub JS, De Groot BL, Mieskes  
1235 G, Moriyama Y, Klingauf J, Grubmüller H, Heuser J, et al (2006) Molecular anatomy of a  
1236 trafficking organelle. *Cell* **127**: 831–846
- 1237 Ting CL, Awasthi N, Müller M & Hub JS (2018) Metastable Prepores in Tension-Free Lipid  
1238 Bilayers. *Phys. Rev. Lett.* **120**: 128103
- 1239 Tong AHY & Boone C (2006) Synthetic genetic array analysis in *Saccharomyces cerevisiae*.  
1240 *Methods Mol. Biol.* **313**: 171–192
- 1241 Tran DM, Ishiwata-Kimata Y, Mai TC, Kubo M & Kimata Y (2019) The unfolded protein  
1242 response alongside the diauxic shift of yeast cells and its involvement in mitochondria  
1243 enlargement. *Sci. Rep.* **9**: 12780
- 1244 Travers KJ, Patil CK, Wodicka L, Lockhart DJ, Weissman JS & Walter P (2000) Functional  
1245 and genomic analyses reveal an essential coordination between the unfolded protein  
1246 response and ER-associated degradation. *Cell* **101**: 249–258
- 1247 Tsuchiya M, Tachibana N, Nagao K, Tamura T & Hamachi I (2022) Organelle-Selective Click  
1248 Labeling Coupled With Flow Cytometry Allows Pooled CRISPR Screening of Genes  
1249 Involved in Phosphatidylcholine Metabolism. *bioRxiv*: 2022.04.18.488621
- 1250 Vähä K, Mattes C, Reinhard J, Covino R, Stumpf H, Hummer G & Ernst R (2021) Cysteine  
1251 cross-linking in native membranes establishes the transmembrane architecture of Ire1.  
1252 *J. Cell Biol.* **220**: e202011078
- 1253 Vevea JD, Garcia EJ, Chan RB, Zhou B, Schultz M, Di Paolo G, McCaffery JM & Pon LA  
1254 (2015) Role for Lipid Droplet Biogenesis and Microlipophagy in Adaptation to Lipid  
1255 Imbalance in Yeast. *Dev. Cell* **35**: 584–599
- 1256 Voeltz GK, Prinz WA, Shibata Y, Rist JM & Rapoport TA (2006) A class of membrane  
1257 proteins shaping the tubular endoplasmic reticulum. *Cell* **124**: 573–586
- 1258 Volmer R, Van Der Ploeg K & Ron D (2013) Membrane lipid saturation activates  
1259 endoplasmic reticulum unfolded protein response transducers through their  
1260 transmembrane domains. *Proc. Natl. Acad. Sci. U. S. A.* **110**: 4628–4633
- 1261 Wakana Y, Takai S, Nakajima KI, Tani K, Yamamoto A, Watson P, Stephens DJ, Hauri HP &

- 1262 Tagaya M (2008) Bap31 is an itinerant protein that moves between the peripheral  
1263 endoplasmic reticulum (ER) and a juxtannuclear compartment related to ER-associated  
1264 Degradation. *Mol. Biol. Cell* **19**: 1825–1836
- 1265 Walter P & Ron D (2011) The unfolded protein response: From stress pathway to  
1266 homeostatic regulation. *Science* **334**: 1081–1086
- 1267 Weber T, Zemelman B V., McNew JA, Westermann B, Gmachl M, Parlati F, Söllner TH &  
1268 Rothman JE (1998) SNAREpins: minimal machinery for membrane fusion. *Cell* **92**:  
1269 759–772
- 1270 Weigel A V., Chang C-L, Shtengel G, Xu CS, Hoffman DP, Freeman M, Iyer N, Aaron J,  
1271 Khuon S, Bogovic J, Qiu W, Hess HF & Lippincott-Schwartz J (2021) ER-to-Golgi  
1272 protein delivery through an interwoven, tubular network extending from ER. *Cell* **184**:  
1273 2412-2429.e16
- 1274 Weill U, Yofe I, Sass E, Stynen B, Davidi D, Natarajan J, Ben-Menachem R, Avihou Z,  
1275 Goldman O, Harpaz N, Chuartzman S, Kniazev K, Knoblach B, Laborenz J, Boos F,  
1276 Kowarzyk J, Ben-Dor S, Zalckvar E, Herrmann JM, Rachubinski RA, et al (2018)  
1277 Genome-wide SWAp-Tag yeast libraries for proteome exploration. *Nat. Methods* **15**:  
1278 617–622
- 1279 Wendland B, Emr SD & Riezman H (1998) Protein traffic in the yeast endocytic and vacuolar  
1280 protein sorting pathways. *Curr. Opin. Cell Biol.* **10**: 513–522
- 1281 Werner T, Sweetman G, Savitski MF, Mathieson T, Bantscheff M & Savitski MM (2014) Ion  
1282 coalescence of neutron encoded TMT 10-plex reporter ions. *Anal. Chem.* **86**: 3594–  
1283 3601
- 1284 Wong LH, Gatta AT & Levine TP (2019) Lipid transfer proteins: the lipid commute via  
1285 shuttles, bridges and tubes. *Nat. Rev. Mol. Cell Biol.* **20**: 85–101
- 1286 Wu X & Rapoport TA (2021) Translocation of Proteins through a Distorted Lipid Bilayer.  
1287 *Trends Cell Biol.* **31**: 473–484
- 1288 Yap WS, Shyu P, Gaspar ML, Jesch SA, Marvalim C, Prinz WA, Henry SA & Thibault G  
1289 (2020) The yeast FIT2 homologs are necessary to maintain cellular proteostasis and  
1290 membrane lipid homeostasis. *J. Cell Sci.* **133**: jcs248526
- 1291 Yofe I, Weill U, Meurer M, Chuartzman S, Zalckvar E, Goldman O, Ben-Dor S, Schütze C,  
1292 Wiedemann N, Knop M, Khmelinskii A & Schuldiner M (2016) One library to make them  
1293 all: streamlining the creation of yeast libraries via a SWAp-Tag strategy. *Nat. Methods*  
1294 **13**: 371–378
- 1295 Young BP, Shin JJH, Orij R, Chao JT, Li SC, Guan XL, Khong A, Jan E, Wenk MR, Prinz  
1296 WA, Smits GJ & Loewen CJR (2010) Phosphatidic acid is a pH biosensor that links  
1297 membrane biogenesis to metabolism. *Science* **329**: 1085–1088
- 1298 Zinser E & Daum G (1995) Isolation and biochemical characterization of organelles from the  
1299 yeast, *Saccharomyces cerevisiae*. *Yeast* **11**: 493–536
- 1300 Zinser E, Sperka-Gottlieb CDM, Fasch E V., Kohlwein SD, Paltauf F & Daum G (1991)  
1301 Phospholipid synthesis and lipid composition of subcellular membranes in the unicellular  
1302 eukaryote *Saccharomyces cerevisiae*. *J. Bacteriol.* **173**: 2026–2034

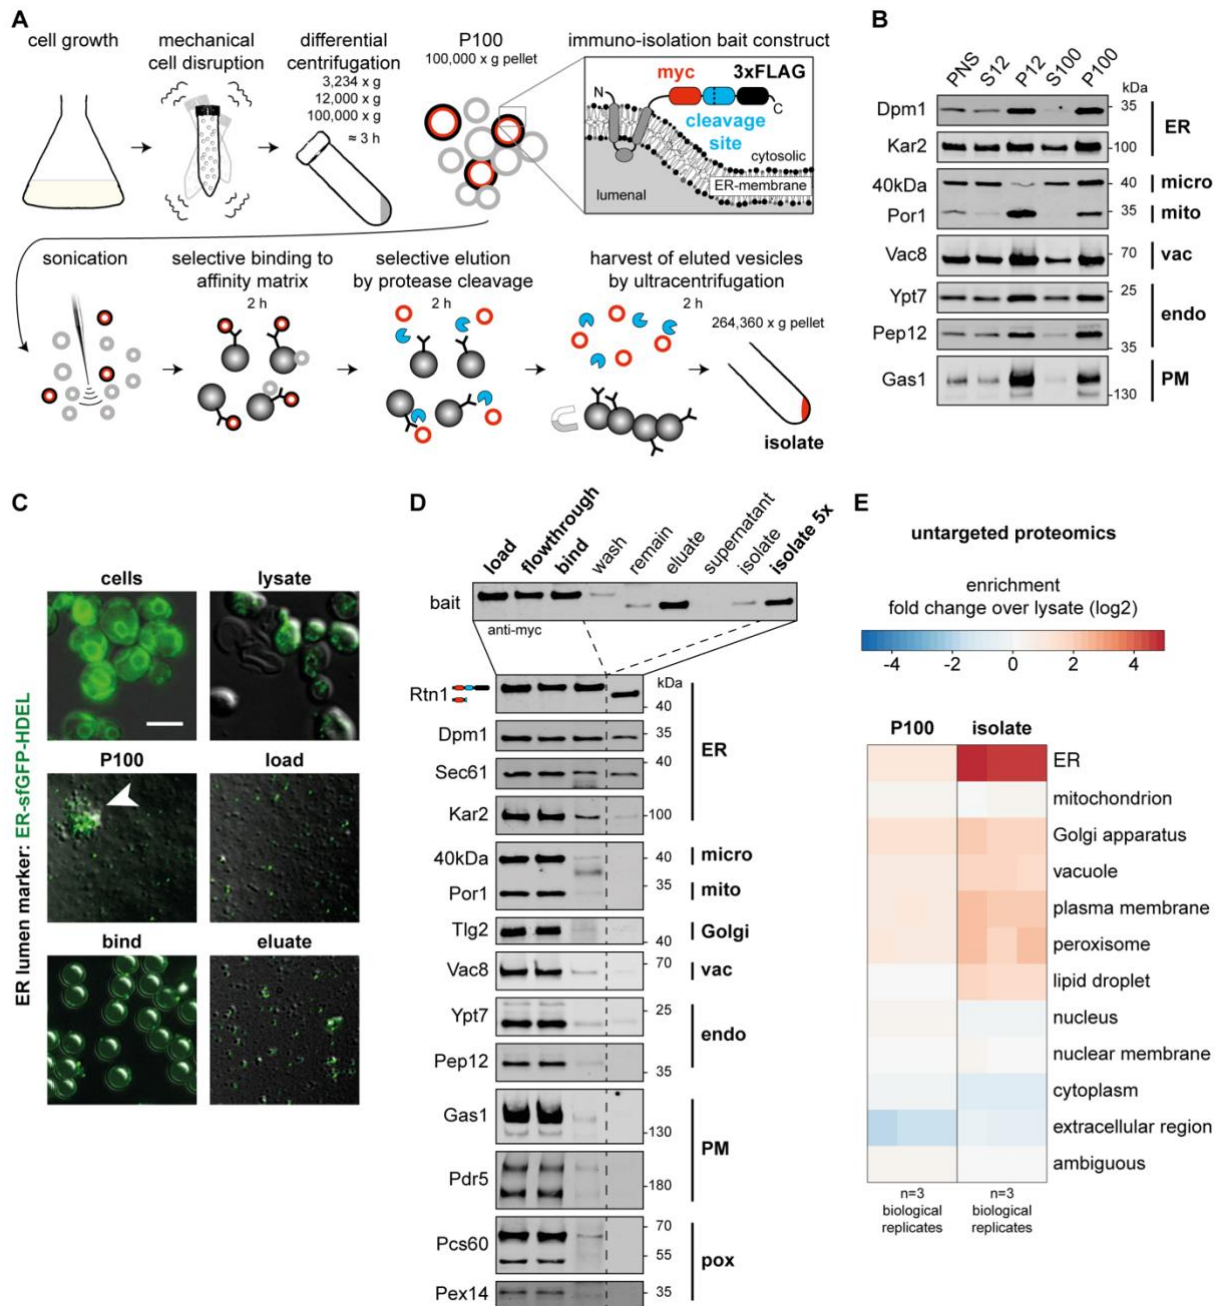

1303

1304 **Figure 1. Immuno-isolation of the ER via MemPrep.** (A) Schematic representation of the immuno-  
 1305 isolation protocol. Cells are cultivated in SCD<sub>complete</sub> medium and mechanically disrupted by vigorous  
 1306 shaking with zirconia/glass beads. Differential centrifugation at 3,234 x g, 12,000 x g, and 100,000 x g  
 1307 yields crude microsomes in the P100 fraction originating from different organelles. The bait tag installed  
 1308 at the C-terminal end of Rtn1 for the immuno-isolation is depicted in the inset (myc-tag, human rhinovirus  
 1309 (HRV) 3C protease cleavage site, 3xFLAG-tag). Sonication segregates clustered vesicles and lowers  
 1310 the vesicle size. ER-derived vesicles are specifically captured by anti-FLAG antibodies bound to Protein-G  
 1311 on magnetic beads. After rigorous washing, the ER-derived vesicles are selectively eluted by cleaving  
 1312 the bait tag with the HRV 3C protease (blue sectors). The eluted ER-derived vesicles (red circles) are  
 1313 harvested and concentrated by ultracentrifugation. (B) Distribution of the indicated organellar markers  
 1314 in the fractions of a differential centrifugation procedure: Supernatant after 3,234 x g centrifugation (post-  
 1315 nuclear supernatant, PNS), supernatant after 12,000 x g centrifugation (S12), pellet after 12,000 x g  
 1316 centrifugation (P12), supernatant after 100,000 x g centrifugation (S100), pellet after 100,000 x g  
 1317 centrifugation (P100). Dpm1 and Kar2 are ER markers, the 40 kDa protein (40kDa) is a marker for light  
 1318 microsomes (Zinser *et al*, 1991), Por1 is a marker of the outer mitochondrial membrane, Vac8 is a  
 1319 vacuolar marker, Ypt7 and Pep12 mark endosomes, and Gas1 serves as plasma membrane marker.  
 1320 7.8 µg total protein loaded per lane. (C) Overlay of fluorescence micrographs and differential  
 1321 interference contrast images of cells and isolation fractions containing an ER luminal marker (ER-sfGFP-

1322 HDEL). Intact cells (cells) show typical ER staining. Mechanical cell disruption leads to fragmentation  
1323 and release of intracellular membranous organelles (lysate). The crude microsomal fraction (P100)  
1324 contains aggregates of GFP-positive and GFP-negative vesicles (white arrowhead). Segregation by  
1325 sonication yields more homogenous size distribution of vesicles (load). Individual ER luminal marker  
1326 containing vesicles are bound to the surface of much larger magnetic beads (bind). Selective elution by  
1327 protease cleavage releases vesicles from the affinity matrix (eluate). **(D)** Immunoblot analysis of  
1328 immuno-isolation fractions for common organellar markers (ER, endoplasmic reticulum; micro,  
1329 microsomal fraction; mito, mitochondria; Golgi, Golgi apparatus; vac, vacuole; endo, endosomal system;  
1330 PM, plasma membrane; pox, peroxisomes). 0.2 % of each fraction loaded per lane. **(E)** Untargeted  
1331 protein mass spectrometry analysis showing enrichment of P100 and isolate fractions over whole cell  
1332 lysate. The determination of organelle enrichment of proteins is based on uniquely annotated cellular  
1333 compartment gene ontology terms.



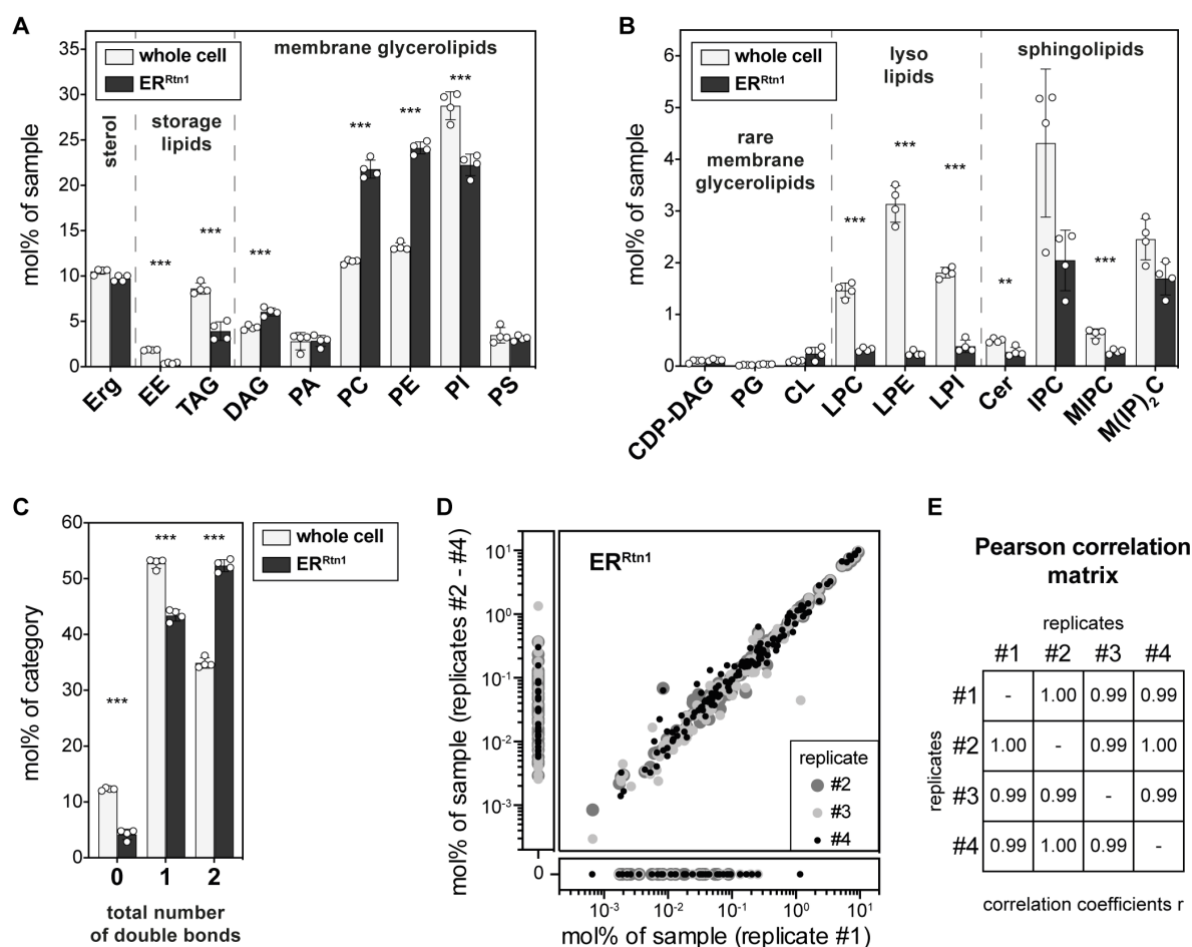

1334

1335

1336 **Figure 2. Lipid composition of the ER of *S. cerevisiae*.** SCD<sub>complete</sub> medium was inoculated with Rtn1-

1337 bait cells to an OD<sub>600</sub> of 0.1 from an overnight pre-culture and cells were harvested at an OD<sub>600</sub> of 1.0.

1338 ER derived membranes were purified by differential centrifugation and immuno-isolation and

1339 subsequently analyzed by quantitative shotgun lipidomics. **(A)** Lipid class composition given as mol%

1340 of all lipids in the sample. Classes are categorized into sterol (Erg, ergosterol), storage lipids (EE,

1341 ergosteryl ester; TAG, triacylglycerol), membrane glycerolipids (DAG, diacylglycerol; PA, phosphatidic

1342 acid; PC, phosphatidylcholine; PE, phosphatidylethanolamine; PI, phosphatidylinositol; PS,

1343 phosphatidylserine). **(B)** Continuation of lipid class composition given as mol% of all lipids in the sample.

1344 Classes are categorized into rare membrane glycerolipids (CDP-DAG, cytidine diphosphate

1345 diacylglycerol; PG, phosphatidylglycerol; CL, cardiolipin), lysolipids (LPC, lyso-phosphatidylcholine;

1346 LPE, lyso-phosphatidylethanolamine; LPI, lyso-phosphatidylinositol) and sphingolipids (Cer, ceramide;

1347 IPC, inositolphosphorylceramide; MIPC, mannosyl-IPC; M(IP)<sub>2</sub>C, mannosyl-di-IPC). **(C)** Total number

1348 of double bonds in membrane glycerolipids, except CL, (*i.e.* CDP-DAG, DAG, PA, PC, PE, PG, PI, PS)

1349 as mol% of this category. **(D)** Reproducibility of immuno-isolated ER lipidome data shown as correlation

1350 of mol% of sample values of all detected lipid species between replicates 1 and replicates 2-4. **(E)**

1351 Pearson correlation coefficients of lipidomics data for all combinations of replicate samples. Statistical

1352 significance was tested by multiple t tests correcting for multiple comparisons using the method of

1353 Benjamini, Krieger and Yekutieli, with Q = 1 %, without assuming consistent standard deviations. \*p <

0.05, \*\*p < 0.01, \*\*\*p < 0.001.

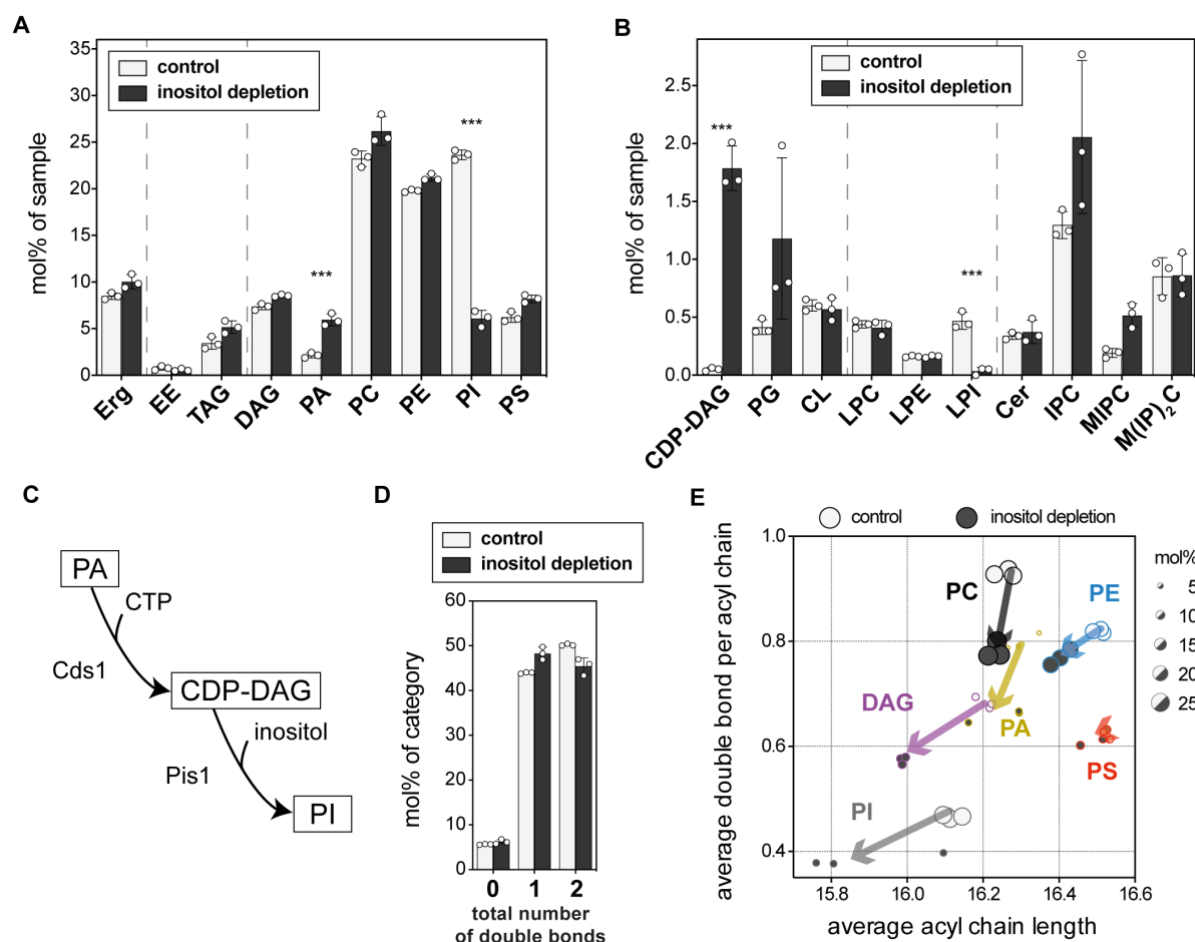

1354  
 1355 **Figure 3. Lipid fingerprints of lipid bilayer stress.** SCD<sub>complete</sub> medium was inoculated with Rtn1-bait  
 1356 cells to an OD<sub>600</sub> of 0.003 from an overnight pre-culture and grown to an OD<sub>600</sub> of 1.2. Cells were washed  
 1357 with inositol free medium and then cultivated for an additional 2 h in either inositol-free (inositol depletion)  
 1358 or SCD<sub>complete</sub> medium (control) starting with an OD<sub>600</sub> of 0.6. ER derived membranes were purified by  
 1359 differential centrifugation and immuno-isolation and subsequently analyzed by quantitative shotgun  
 1360 lipidomics. **(A)** Lipid class composition given as mol% of all lipids in the sample. Sterol (Erg, ergosterol),  
 1361 storage lipids (EE, ergosteryl ester; TAG, triacylglycerol) and membrane glycerolipids (DAG,  
 1362 diacylglycerol; PA, phosphatidic acid; PC, phosphatidylcholine; PE, phosphatidylethanolamine; PI,  
 1363 phosphatidylinositol; PS, phosphatidylserine). **(B)** Rare membrane glycerolipids (CDP-DAG, cytidine  
 1364 diphosphate diacylglycerol; PG, phosphatidylglycerol; CL, cardiolipin), lysolipids (LPC, lyso-  
 1365 phosphatidylcholine; LPE, lyso-phosphatidylethanolamine; LPI, lyso-phosphatidylinositol) and  
 1366 sphingolipids (Cer, ceramide; IPC, inositolphosphorylceramide; MIPC, mannosyl-IPC; M(IP)<sub>2</sub>C,  
 1367 mannosyl-di-IPC). **(C)** Lipid metabolic pathway of PI biogenesis. **(D)** Total number of double bonds in  
 1368 membrane glycerolipids (except CL which has four acyl chains) as mol% of this category. **(E)** Change  
 1369 of average acyl chain length and unsaturation upon inositol depletion. Dot diameters are proportional to  
 1370 abundance of the respective lipid class in the ER membrane (as in Figure 3A) of indicated growth  
 1371 condition. Statistical significance was tested by multiple t tests correcting for multiple comparisons using  
 1372 the method of Benjamini, Krieger and Yekutieli, with Q = 1 %, without assuming consistent standard  
 1373 deviations. \*p < 0.05, \*\*p < 0.01, \*\*\*p < 0.001.

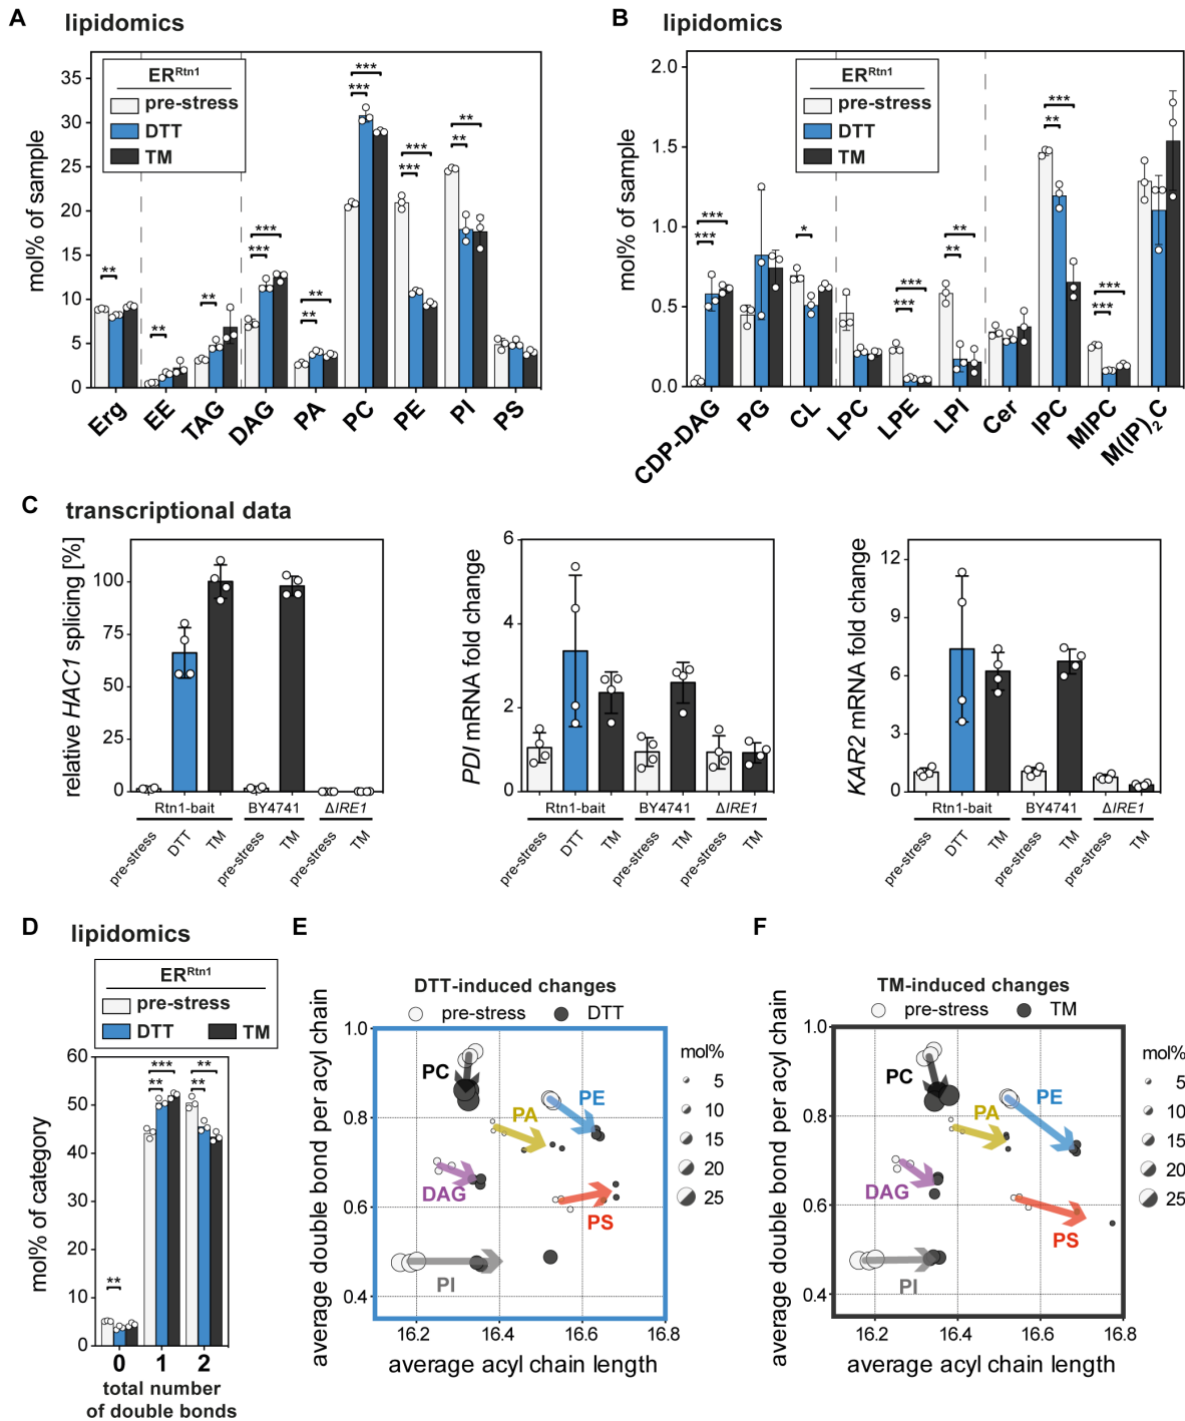

1374

1375 **Figure 4. ER lipidomes of DTT- and TM-stressed cells indicate a shift towards a thicker, more**  
 1376 **saturated membrane.** SCD<sub>complete</sub> medium was inoculated with Rtn1-bait cells to an OD<sub>600</sub> of 0.1 from  
 1377 an overnight pre-culture. Cells were grown to an OD<sub>600</sub> of 0.8 and then stressed by addition of either 2  
 1378 mM DTT or 1.5 µg/ml TM for 4 h. ER derived membranes were purified by differential centrifugation and  
 1379 immuno-isolation and subsequently analyzed by quantitative shotgun lipid mass spectrometry. **(A)** Lipid  
 1380 class distribution of sterol, storage lipids and abundant membrane glycerolipids in ER-derived vesicles  
 1381 from cells that were either challenged with 2 mM dithiothreitol (DTT) or 1.5 µg/ml TM for 4 h. The ER  
 1382 lipidome undergoes significant remodeling upon ER stress. **(B)** Lipid class distribution of rare membrane  
 1383 glycerolipids, lysolipids and sphingolipids. **(C)** Cells were grown as described above. UPR activation  
 1384 was measured by determining the levels of spliced *HAC1* mRNA and the mRNA of downstream UPR  
 1385 target genes (*PDI*, *KAR2*) before and after 4 h of DTT or TM treatment. Data for relative *HAC1* splicing  
 1386 was normalized to the TM treated Rtn1-bait condition. *PDI* and *KAR2* mRNA fold changes were  
 1387 calculated as  $2^{-\Delta\Delta CT}$  and normalized to Rtn1-bait pre-stress. **(D)** Total number of double bonds in  
 1388 membrane glycerolipids (without CL) given as mol% of this category. **(E)** Changes in average acyl chain  
 1389 length and unsaturation of main glycerolipid classes upon DTT induced ER stress. Dot diameters are

1390 proportional to abundance of the respective lipid class in the ER membrane (as in Figure 4A) of indicated  
1391 growth condition. **(F)** Changes in average acyl chain length and unsaturation of main glycerolipid classes  
1392 upon TM induced ER stress. Statistical significance was tested by multiple t tests correcting for multiple  
1393 comparisons using the method of Benjamini, Krieger and Yekutieli, with  $Q = 1\%$ , without assuming  
1394 consistent standard deviations. \* $p < 0.05$ , \*\* $p < 0.01$ , \*\*\* $p < 0.001$ .

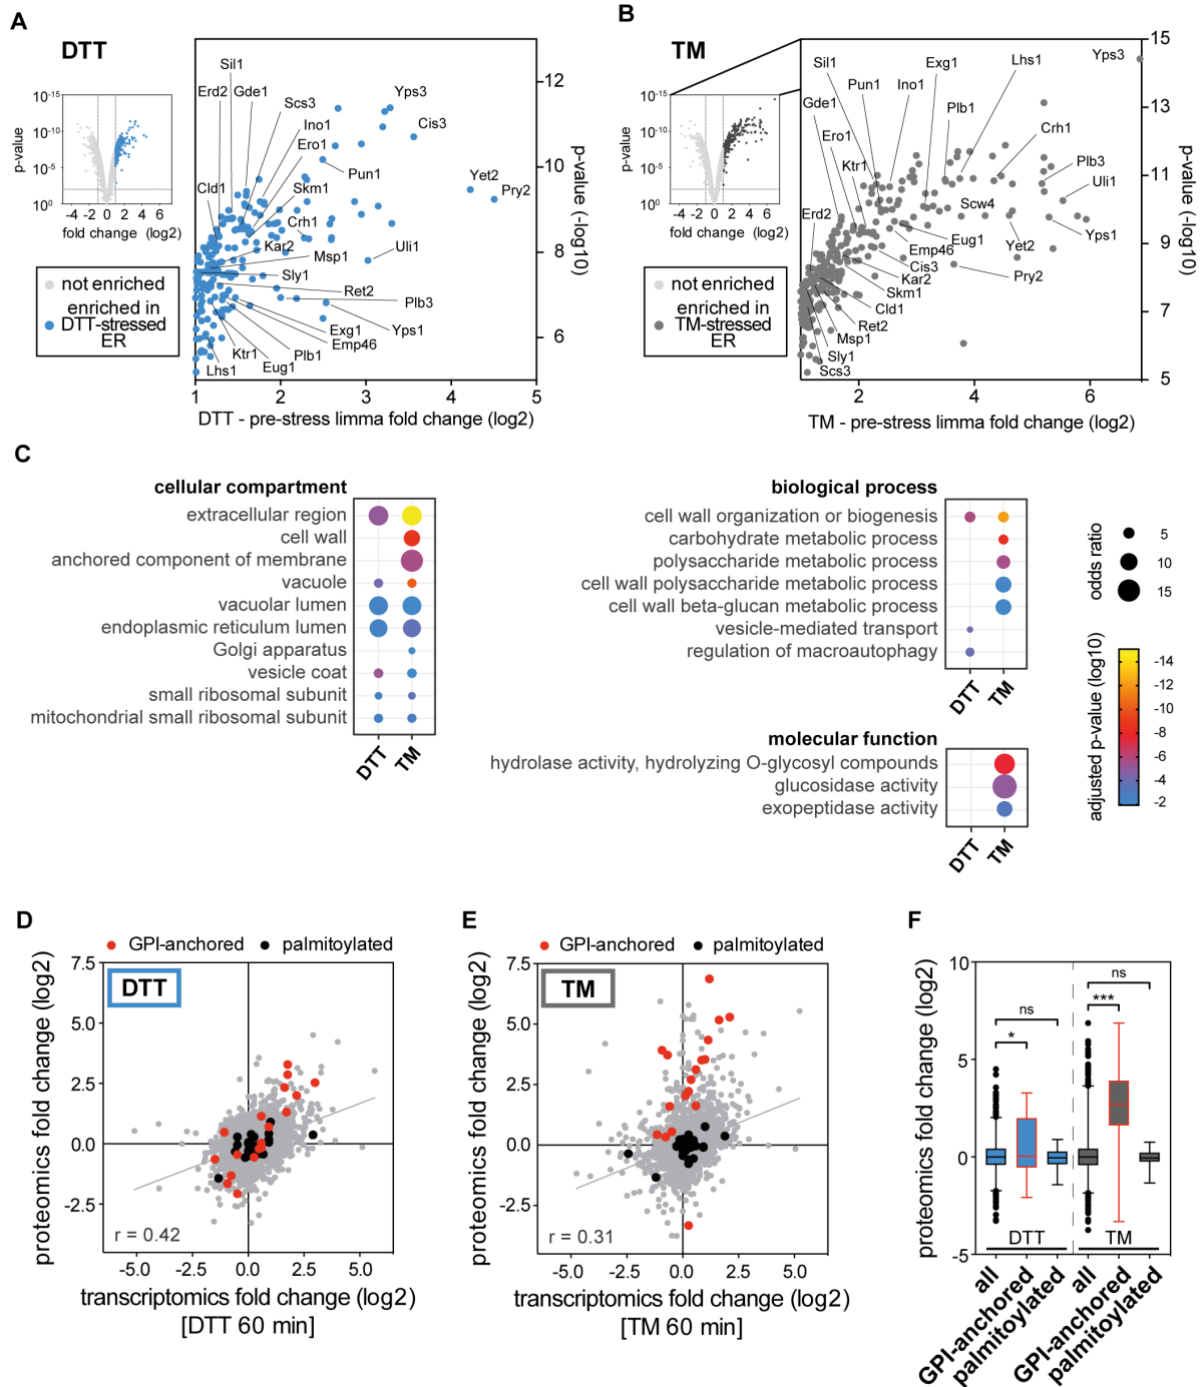

1395  
1396  
1397  
1398  
1399  
1400  
1401  
1402  
1403  
1404  
1405  
1406  
1407  
1408  
1409  
1410  
1411

**Figure 5. The proteome of the ER under conditions of prolonged proteotoxic stress.** ER-derived vesicles were isolated by MemPrep and subsequently analyzed by untargeted proteomics. An additional sodium carbonate wash step was performed on P100 to remove soluble proteins from the membrane preparation. **(A)** Limma analysis identified proteins that are accumulating in ER preparations after prolonged DTT-induced stress (blue dots, top right quadrant of volcano-plot). Proteins that are discussed in the text are indicated. **(B)** Limma analysis showing proteins that are accumulating in the ER upon prolonged TM-induced ER stress (gray dots, top right quadrant of volcano-plot). Proteins that are discussed in the text are indicated. Accumulation of proteins in stressed ER was considered significantly when they were at least enriched two-fold compared to pre-stress with a p-value <0.01. **(C)** Enriched gene ontology terms (GO terms) in the list of proteins that are accumulating in ER-derived vesicles under the indicated ER stress conditions. GO terms are grouped by categories, FDR <1 %. **(D)** Correlation of previously published transcriptome data after one hour of DTT stress with our proteomics data after 4 h DTT-induced ER stress (Pearson correlation  $r = 0.42$ ). GPI-anchored proteins (red dots) are clustering above the line of linear regression in contrast to palmitoylated proteins (black dots). **(E)** Correlation of previously published transcriptome data after one hour of TM stress with our proteomics data after 4 h TM-induced ER stress (Pearson correlation  $r = 0.31$ ). In contrast to palmitoylated proteins



1412 (black dots) GPI-anchored proteins (red dots) are clustering above the line of linear regression. **(F)**  
1413 Median limma fold changes over pre-stress condition of GPI-anchored, palmitoylated and all identified  
1414 proteins. Whiskers indicate 1-99 percentile, significance was tested by Kolmogorov-Smirnov test. \* $p <$   
1415 0.05, \*\* $p <$  0.01, \*\*\* $p <$  0.001.

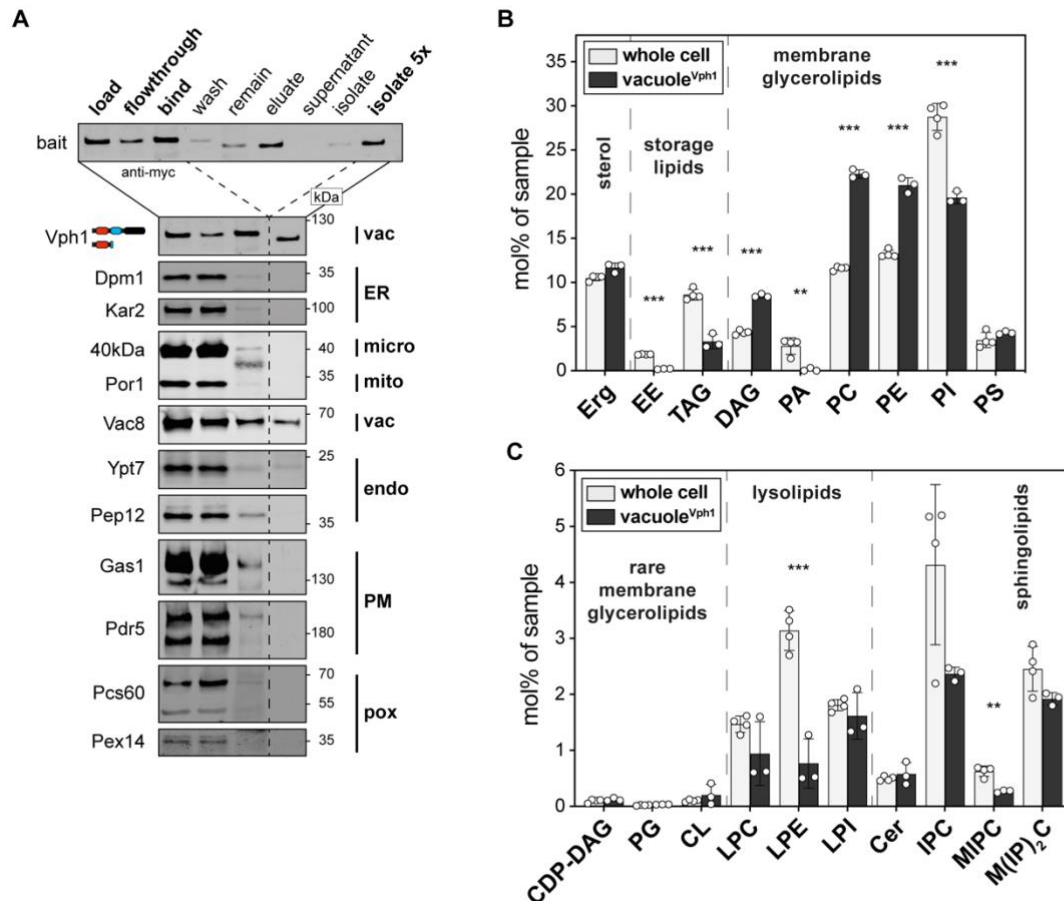

1416  
 1417 **Figure 6. Lipid composition of the vacuolar membrane. (A)** Immunoblot analysis of fractions after  
 1418 immuno-isolation via a vacuolar bait protein (Vph1-bait). Common organellar markers are shown: ER,  
 1419 endoplasmic reticulum (Dpm1 and Kar2); micro, microsomal fraction (40kDa); mito, mitochondria (Por1);  
 1420 vac, vacuole (Vac8); endo, endosomal system (Ypt7 and Pep12); PM, plasma membrane (Gas1 and  
 1421 Pdr5); pox, peroxisomes (Pcs60 and Pex14). 0.2 % of each fraction loaded per lane. **(B)** Lipid class  
 1422 composition given as mol% of all lipids in the sample. Classes are categorized into sterol (Erg,  
 1423 ergosterol), storage lipids (EE, ergosteryl ester; TAG, triacylglycerol), membrane glycerolipids (DAG,  
 1424 diacylglycerol; PA, phosphatidic acid; PC, phosphatidylcholine; PE, phosphatidylethanolamine; PI,  
 1425 phosphatidylinositol; PS, phosphatidylserine). **(C)** Continuation of lipid class composition given as mol%  
 1426 of all lipids in the sample. Classes are categorized into rare membrane glycerolipids (CDP-DAG, cytidine  
 1427 diphosphate diacylglycerol; PG, phosphatidylglycerol; CL, cardiolipin), lysolipids (LPC, lyso-  
 1428 phosphatidylcholine; LPE, lyso-phosphatidylethanolamine; LPI, lyso-phosphatidylinositol) and  
 1429 sphingolipids (Cer, ceramide; IPC, inositolphosphorylceramide; MIPC, mannosyl-IPC; M(IP)<sub>2</sub>C,  
 1430 mannosyl-di-IPC). Statistical significance was tested by multiple t tests correcting for multiple  
 1431 comparisons using the method of Benjamini, Krieger and Yekutieli, with Q = 1 %, without assuming  
 1432 consistent standard deviations. \*p < 0.05, \*\*p < 0.01, \*\*\*p < 0.001.

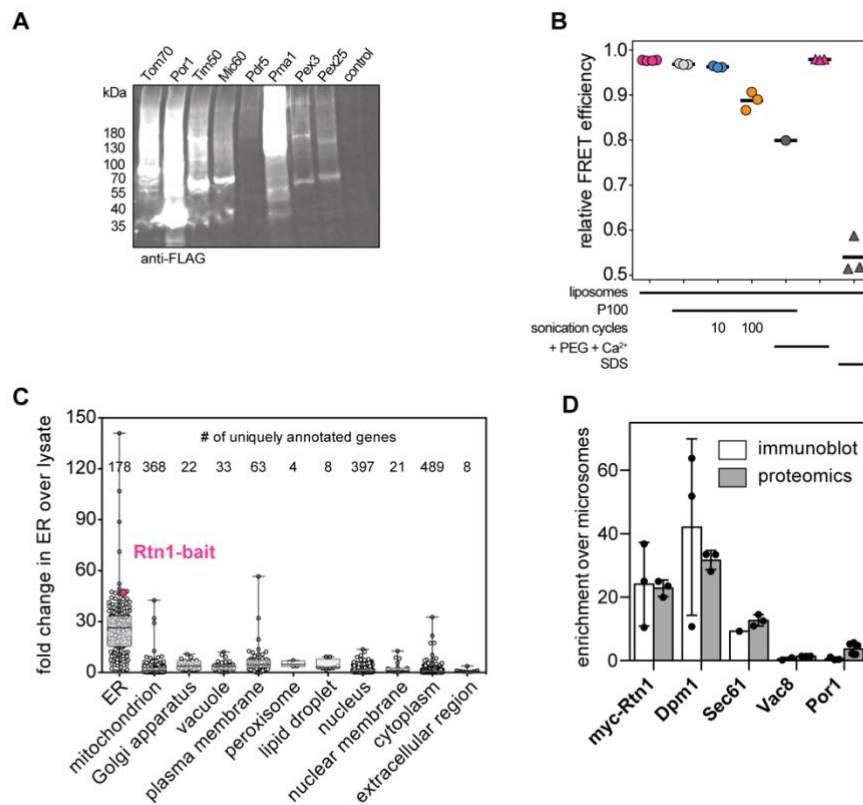

1433  
 1434 **Supplementary Figure S1.** (A) From a systematic collection of strains in which every protein is tagged  
 1435 with a C-terminal bait tag (myc-3C-3xFLAG) we generated cell lysates for exemplary strains embedded  
 1436 in different organellar membranes. (B) Relative FRET efficiencies in mixtures of labeled liposomes and  
 1437 excess of unlabeled P100 microsomes after sonication, incubation with polyethylene glycol (PEG) and  
 1438 Ca<sup>2+</sup>, or sodium dodecyl sulfate (SDS). Lower relative FRET efficiency is the result of decreased  
 1439 average proximity of the two FRET-pair fluorophores and is therefore indicative for fusion of labeled  
 1440 liposomes with unlabeled P100 microsomes. (C) Number of genes with uniquely annotated cellular  
 1441 component gene ontology terms (indicated on the x-axis) that have been used to calculate organellar  
 1442 enrichments based on quantitative proteomics in Figure 1E. The fold change over the lysate of each  
 1443 individual protein in the ER fraction is plotted on the y-axis. The Rtn1-bait protein is highlighted in pink.  
 1444 (D) Correlation of enrichments of organellar markers determined by either immunoblot analysis or  
 1445 proteomics. immuno-isolation bait protein (myc-Rtn1), ER markers Dpm1 and Sec61, vacuole marker  
 1446 Vac8, and outer mitochondrial membrane marker Por1.

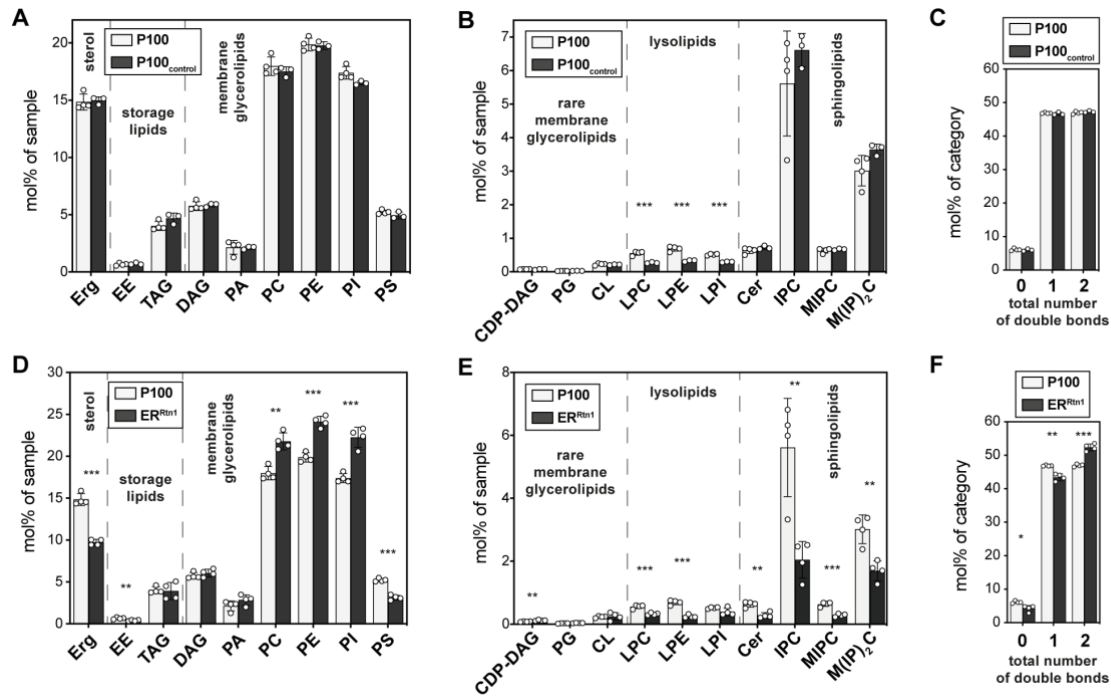

1447

1448

1449

1450

1451

1452

1453

1454

1455

1456

1457

1458

**Supplementary Figure S2. Lysolipids are depleted from the samples during the isolation procedure.** To control stability of the sample an aliquot of P100 microsomes was incubated at 4 °C and overhead rotation (P100<sub>control</sub>) while the remaining sample was purified by immuno-isolation. **(A)** Abundance of detected lipid classes in microsomes (P100) and control microsomes after incubation for 8 h at 4 °C (P100<sub>control</sub>). **(B)** Lipid class distribution showing significantly less lyso-phospholipids in control microsomes (P100<sub>control</sub>). **(C)** The total number of double bonds in membrane glycerolipids is not changed. **(D), (E)** and **(F)** The lipid composition of the P100 crude membrane fraction before immuno-isolation (P100) is significantly different from the lipidome of ER vesicles derived by immuno-isolation via Rtn1 (ER<sup>Rtn1</sup>). Statistical significance was tested by multiple t tests correcting for multiple comparisons using the method of Benjamini, Krieger and Yekutieli, with Q = 1 %, without assuming consistent standard deviations. \*p < 0.05, \*\*p < 0.01, \*\*\*p < 0.001.

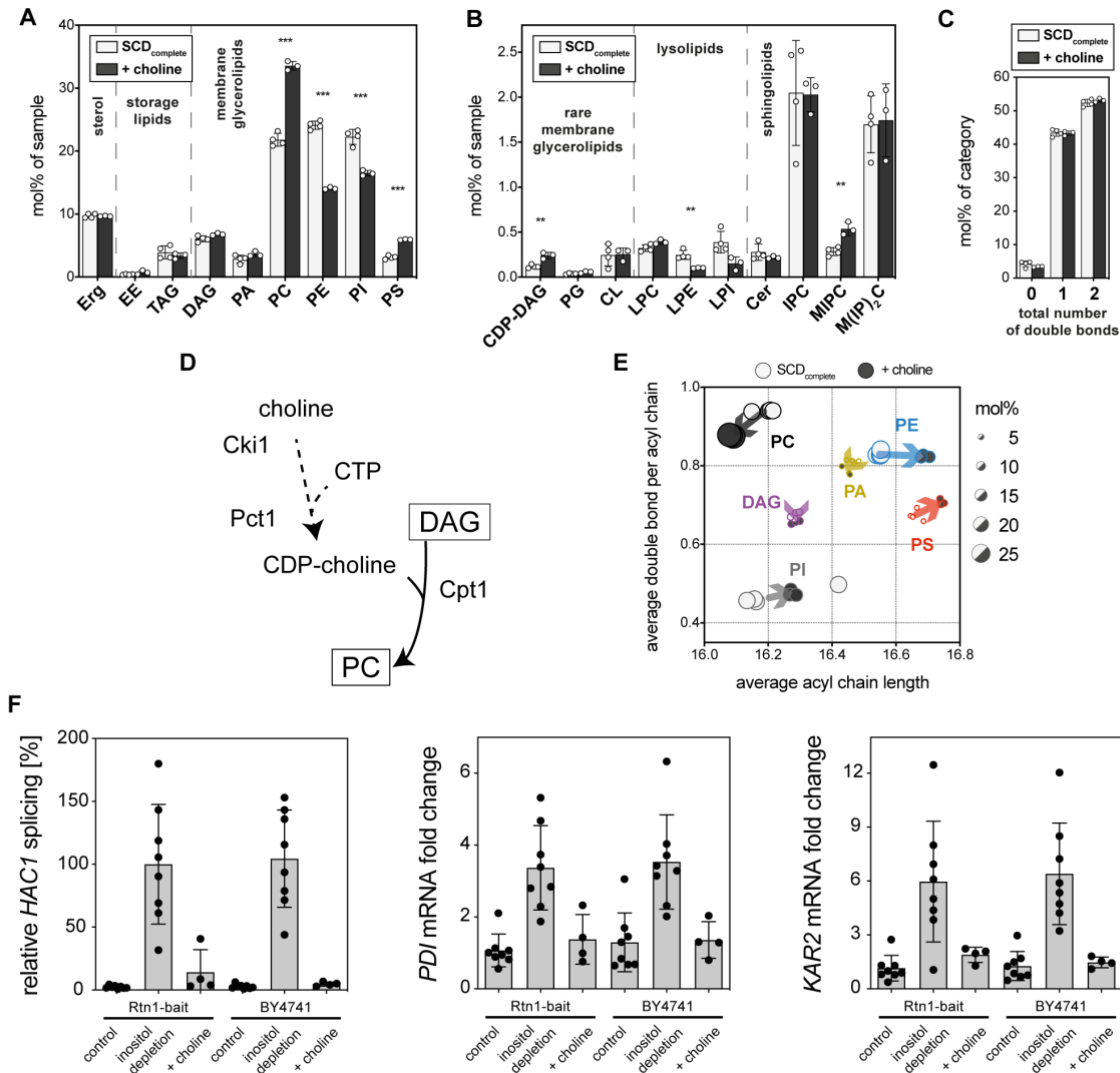

1459

1460

1461

1462

1463

1464

1465

1466

1467

1468

1469

1470

1471

1472

1473

1474

1475

1476

1477

1478

**Supplementary Figure S3. Metabolic interference with choline does not activate the UPR despite inducing dramatic lipidome changes.** SCD<sub>complete</sub> medium containing 2 mM choline (+choline) was inoculated with Rtn1-bait cells to an OD<sub>600</sub> of 0.1 from an overnight pre-culture and cells were harvested at an OD<sub>600</sub> of 1.0. ER derived membranes were purified by differential centrifugation and immunosolation and subsequently analyzed by quantitative shotgun lipidomics. **(A)** Lipid class composition given as mol% of all lipids in the sample. **(B)** Less abundant classes. **(C)** Total number of double bonds in membrane glycerolipids (except CL which has four acyl chains) as mol% of this category. Statistical significance was tested by multiple t tests correcting for multiple comparisons using the method of Benjamini, Krieger and Yekutieli, with Q = 1 %, without assuming consistent standard deviations. \*p < 0.05, \*\*p < 0.01, \*\*\*p < 0.001. **(D)** Lipid metabolic map of PC biosynthesis from external choline sources. **(E)** Changes in average acyl chain length and saturation of the main glycerophospholipid classes. Dot diameters are proportional to abundance of the respective lipid class in the ER membrane (as in Supplementary Figure S3A) of indicated growth condition. **(F)** Cells were grown as described above (+choline) or as described for inositol depletion experiments (Figure 3). In brief, Rtn1-bait cells with an OD<sub>600</sub> of 1.2 were washed with inositol free medium and then cultivated for an additional 2 h in either inositol-free (inositol depletion) or SCD<sub>complete</sub> medium (control). UPR activation was measured by determining the levels of spliced *HAC1* mRNA and mRNA of UPR target genes (*PDI* and *KAR2*). Data for relative *HAC1* splicing was normalized to Rtn1-bait cells under inositol depletion. *PDI* and *KAR2* mRNA fold changes were calculated as 2<sup>-ΔΔCT</sup> and normalized to the Rtn1-bait control condition.



1479

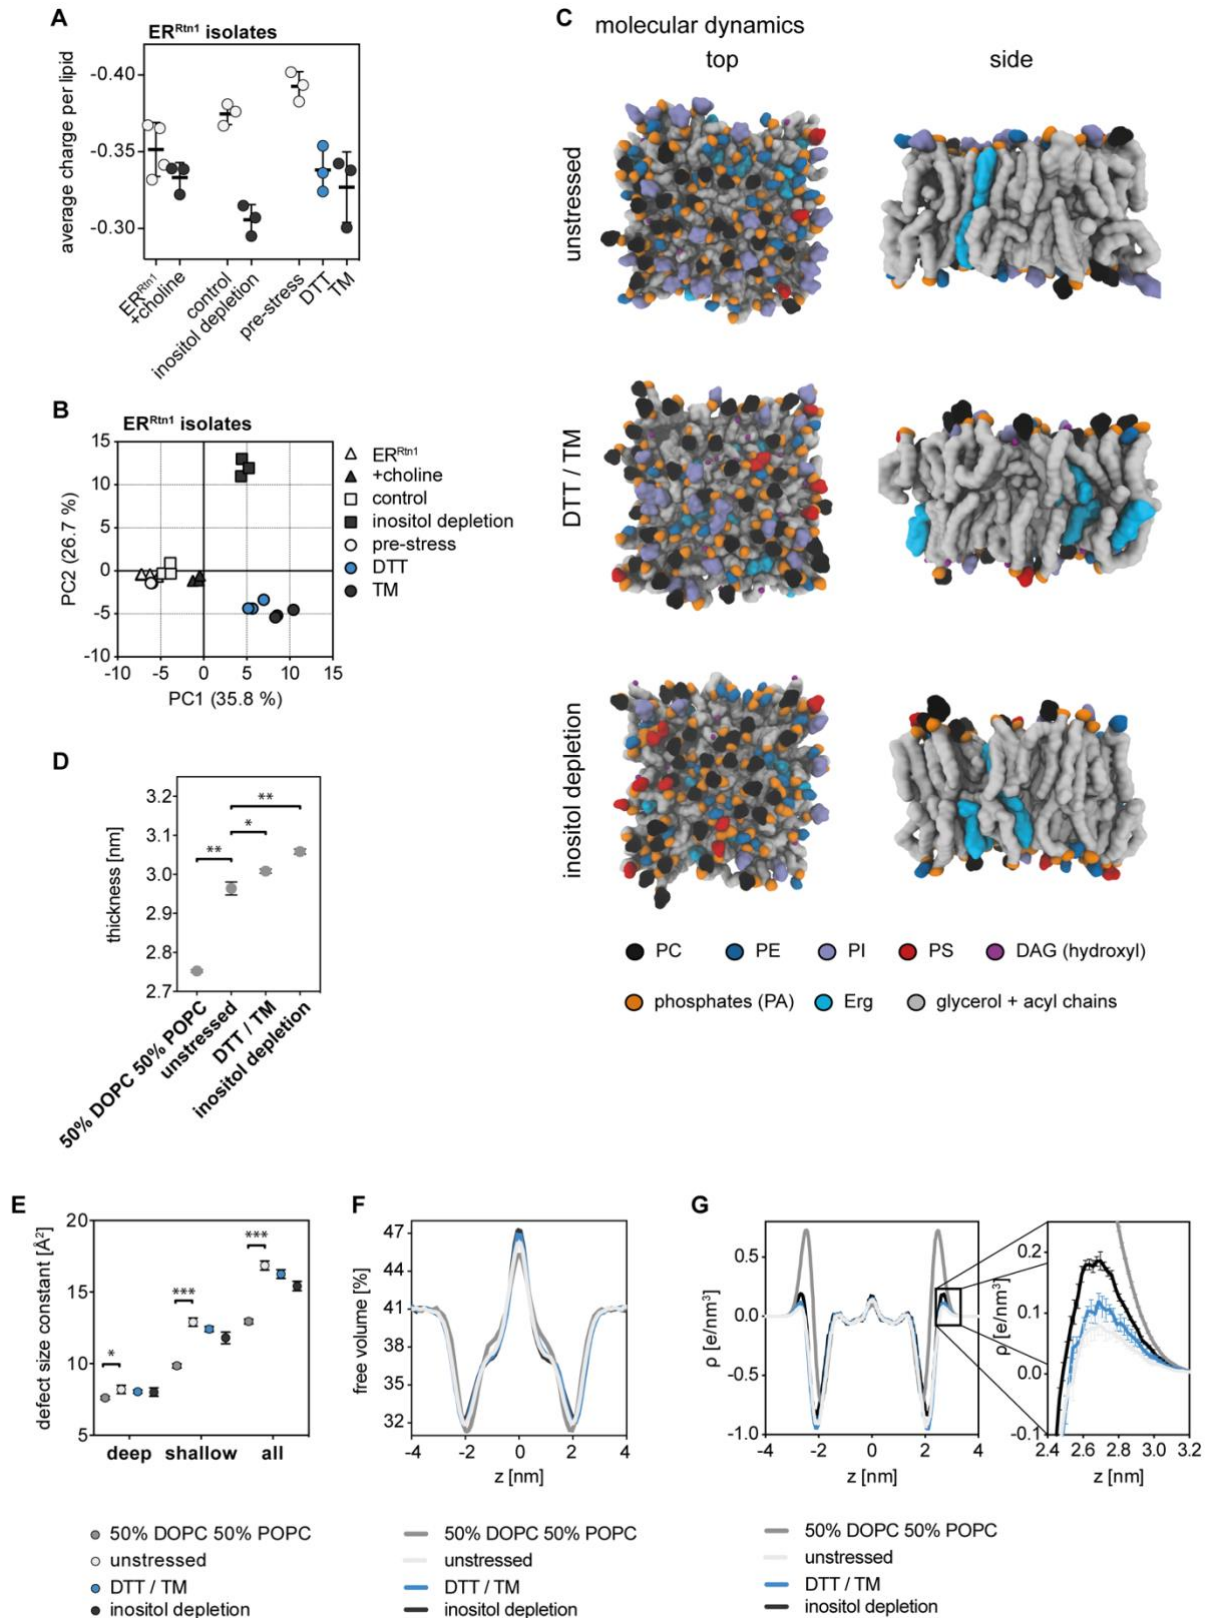

1480  
1481  
1482  
1483  
1484  
1485  
1486  
1487

**Supplementary Figure S4. (A)** Charge density of analyzed ER membranes represented as average charge per lipid. Net charges of the lipid classes were considered as follows: Erg 0, EE 0, TAG 0, DAG 0, PA -1, PC 0, PE 0, PI -1, PS -1, CDP-DAG -2, PG -1, CL -2, Cer 0, IPC -1, MIPC -1, M(IP)<sub>2</sub>C -2. **(B)** Principal component analysis (PCA) of lipidomics data from all ER-derived vesicle preparations. Based on 97 lipid molecular species that were detected in every sample. **(C)** Molecular dynamics (MD) simulations of proposed commercially available *in vitro* ER membrane lipid mixes for unstressed ER (unstressed) and ER under two different lipid bilayer stress conditions (DTT / TM, inositol depletion).

1488 Snapshots were taken after 100 ns. **(D)** Thickness measurements taken from MD simulations. **(E)**  
1489 Determination of defect size constants in MD simulation of model membranes. **(F)** Free volume  
1490 calculations from MD simulations. **(G)** The distribution of charges from MD simulations.

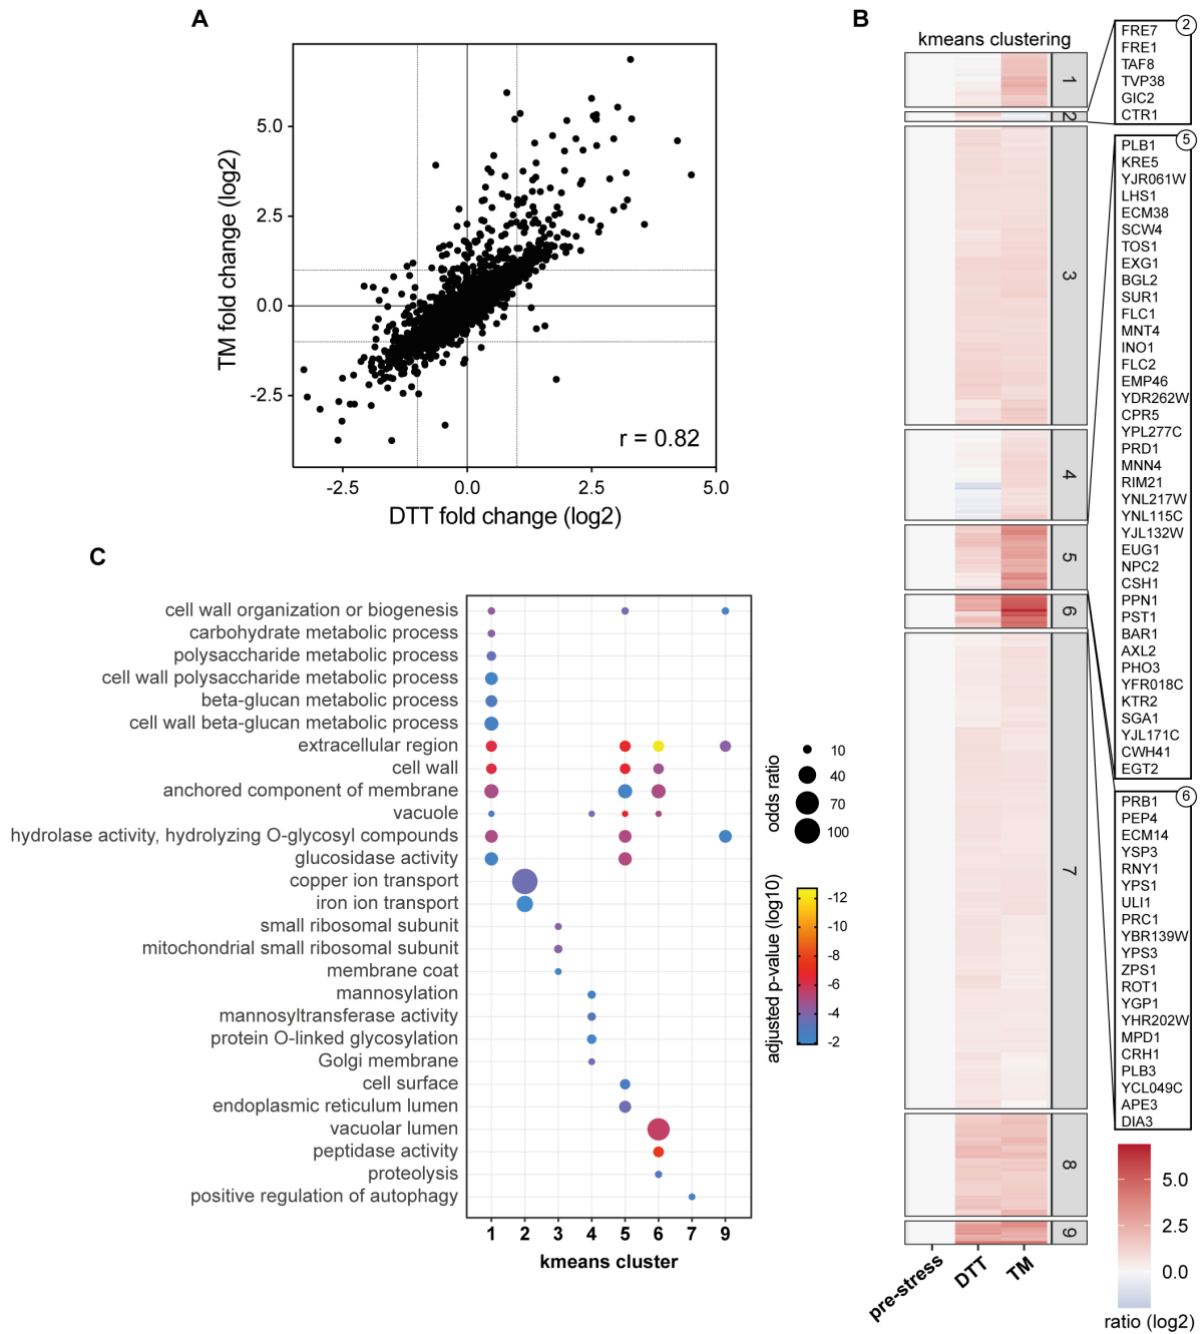

1491  
1492  
1493  
1494  
1495  
1496

**Supplementary Figure S5. K-means clustering of DTT- and TM-induced changes in ER proteomes. (A)** Correlation of DTT- and TM-induced limma fold changes over pre-stress with a Pearson correlation coefficient  $r = 0.82$ . **(B)** K-means clustering of proteins accumulating in the ER upon prolonged DTT- or TM-induced ER stress. **(C)** Gene ontology term enrichments in K-means clusters.

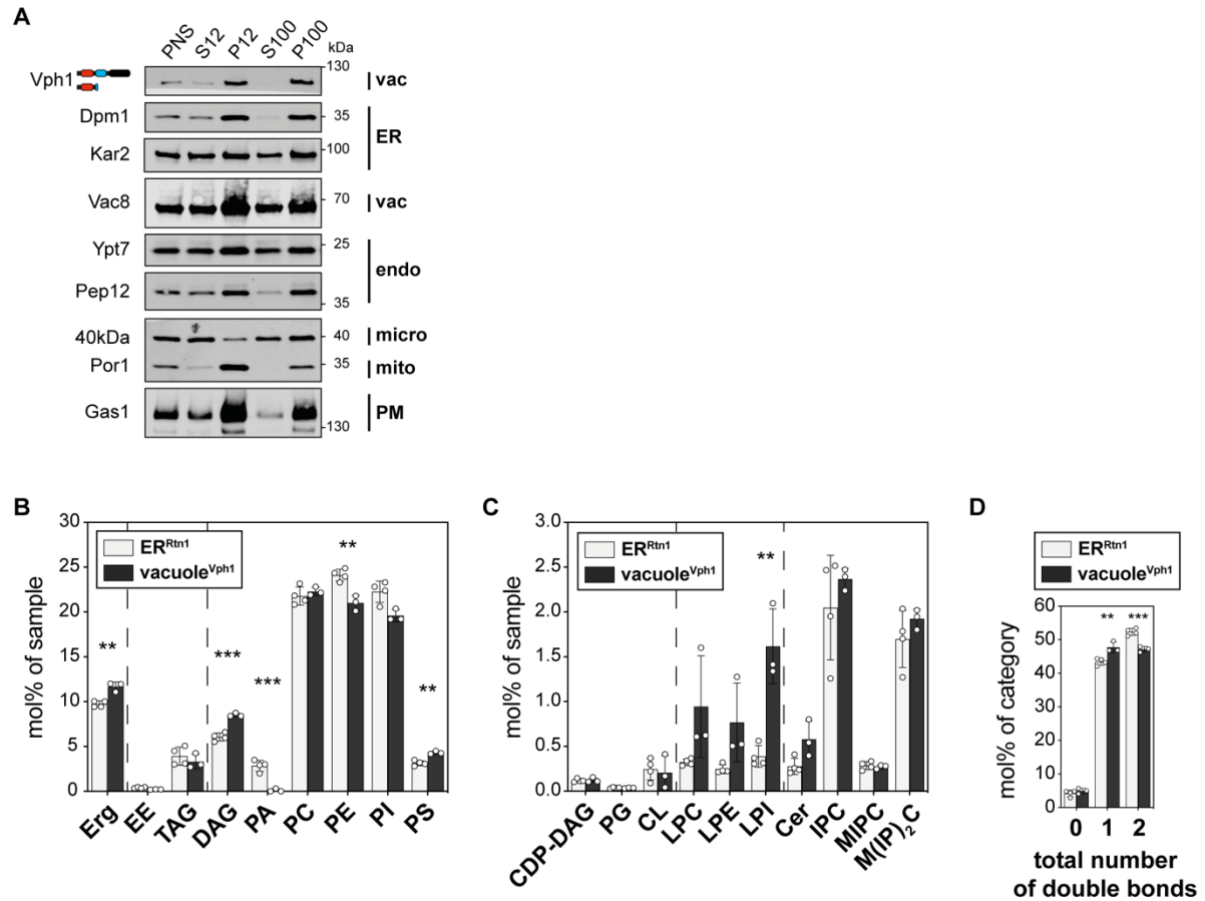

1497  
1498  
1499  
1500  
1501  
1502  
1503  
1504

**Supplementary Figure S6. Lipidomics of the vacuole. (A)** Differential centrifugation. **(B)** Lipid composition. **(C)** Continuation of lipid composition. **(D)** Saturation degree of membrane glycerolipids. Statistical significance was tested by multiple t tests correcting for multiple comparisons using the method of Benjamini, Krieger and Yekutieli, with  $Q = 1\%$ , without assuming consistent standard deviations. \* $p < 0.05$ , \*\* $p < 0.01$ , \*\*\* $p < 0.001$ .

1505 **Supplementary Table S1. Gene markers to calculate organell enrichments.** All genes with unique  
1506 gene ontology term annotations in the category cellular component that were used to calculate ER  
1507 enrichment.

1508 **Supplementary Table S2. *In vitro* and *in silico* lipid mixtures.** Proposed ER-like lipid compositions  
1509 for unstressed ER and different forms of lipid-bilayer stress (DTT / TM, inositol depletion) based on our  
1510 lipidomics data. All lipids are commercially available to enable *in vitro* use.

1511 **Supplementary Table S3. Lipidomics data.** All lipidomics data in this study.

1512 **Supplementary Table S4. Analysis of protein enrichments and depletion during MemPrep of**  
1513 **the ER using quantitative proteomics.** All proteomics data related to the validation of the ER  
1514 isolation in Figure 1E.

1515 **Supplementary Table S5. Prolonged proteotoxic stress causes substantial changes in the ER**  
1516 **proteome.** All proteomics data related to the data presented in Figure 5.

1517



1518 **Acknowledgements**

1519 We wish to thank Michael Knop for generously providing the C' SWAT library. We would like to  
1520 thank Sepp Kohlwein, Karin Römisch, Christian Ungermann, Howard Riezman, Karl Kuchler, and Ralf  
1521 Erdmann for providing antibodies and Sarah L. Keller, Georg Pabst as well as Chris Stefan for fruitful  
1522 discussions and helpful comments. This work was funded by the VW foundation (Life?, #93089, #93092,  
1523 #93090) to R.E., M.S., and J.S., by the Deutsche Forschungsgemeinschaft in the framework of the  
1524 SFB894 to R.E. and the SFB1027 to J.H., and R.E., and by the European Research Council under the  
1525 European Union's Horizon 2020 research and innovation program (grant agreement no. 866011). MS  
1526 is an incumbent of the Dr. Gilbert Omenn and Martha Darling Professorial Chair in Molecular Genetics.  
1527

1528 **Conflict of Interest**

1529 C. K. is employed by the company Lipotype GmbH, Dresden. The remaining authors declare  
1530 that the research was conducted in the absence of any other commercial or financial relationships that  
1531 could be construed as a potential conflict of interest.
